# Supplementary material for: Comparative analyses of putative toxin gene homologs from an Old World viper, Daboia russelii
Source: PeerJ. 2017 Dec 5;5:e4104. doi: 10.7717/peerj.4104 (PMC5721910; doi:10.7717/peerj.4104)
Supplement: Supplemental Information 3 [file peerj-05-4104-s003.xlsx]

## Sheet: Sheet1
Table S1: Accession numbers of the putative toxin gene homologs in Russell's viper submitted to GenBank. For 3 genes, the actual sequences are provided.
Gene Name	Accession numbers
ACHE	MF289106
ADAM11	MF289107
ADAM17	MF289108
ADAM19	MF289109
ADAM23	MF289110
CLEC11A	MF289111
CLEC16A	MF289112
CLEC19A	MF289113
CLEC3A	MF289114
CLEC3B	MF289115
CPAMD8	MF289116
CRISP	MF289117
EDN1	MF289118
EDN3	MF289119
F5	MF289120
KLK14	MF289121
KLKB1	MF289122
kunitoxin	MF289123
NGF	MF289124
NPR1	MF289125
NPR2	MF289126
NPR3	MF289127
PLA2G10	MF289128
PLA2G12A	MF289129
PLA2G12B	MF289130
PLA2G15	MF289131
PLA2G1B	MF289132
PLA2G3	MF289133
PLA2G4A	MF289134
PLA2G4C	MF289135
PLA2G6	MF289136
PLA2G7	MF289137
PLA2R1	MF289138
PLAA	MF289139
PROK1	MF289140
PROK2	MF289141
serotriflin	MF289142
SPSB1	MF289143
SPSB3	MF289144
SPSB4	MF289145
VEGFA1	MF289146
VEGFA2	MF289147
VEGFA3	MF289148
VEGFB	MF289149
VEGFC	MF289150
WAP	MF289151
WFIKKN1	MF289152
WFIKKN2	MF289153
Crotasin	GCCGACATGGAAAATAATGCCATCTCCATCTGCGACCACGGATATCTTCAAGATATGGCCAATGACCNNN
CSTA	ATGTCGTGCGGCGGACTCTCCGAGCCAAAGGCGGCTACTGNNNNNNNNNNNNNNNNNNNNNNNNAGATAAAGTCACAGCTGGAAGAAAAAGAAAGCAGGAACTTTACCACCTTCAATGCCATTTCATATAAAACACAAGTGGTTGCTGGAATAAACTATTTCATCAAG
VEGFF	TTTCCCACATCTTCAAGCCCTCCTGTGTCATCCTGTGGTGATGCGCCAGCTGCTGCAACGACGACAGCTTGAAGTGCNN
