# Supplementary material for: Comparative analyses of putative toxin gene homologs from an Old World viper, Daboia russelii
Source: PeerJ. 2017 Dec 5;5:e4104. doi: 10.7717/peerj.4104 (PMC5721910; doi:10.7717/peerj.4104)
Supplement: Supplemental Information 4 [file peerj-05-4104-s004.xlsx]

## Sheet: Sheet1
Table S2: The amino acid sequences for the Russell’s viper’s putative toxin gene homologs.
gene	domain	seq
wfikkn1	wap	GMCPNQLNPNLWVdaqSTCERECQADQXXXXXEKCCTNVCGlRSCV
	i_set	HQLVYMGGTVSFHCDVSGRPRPDITWEKQsDHQ-ENfimrpDQMYGNMVVTNIGQLVIYNAQPEDAGIYTCTARNSAGLLRADFPLSV
	kunitz_bpti_1	CLKEPDTQDCETSQTRWHFDSKKGSCVTFRYGNCGANQNHFDTYEECQVAC
	kunitz_bpti_2	CXXPMVQGPCKNWEPRWAYNHLMKQCHSFIYGGCEGNENNFDSKESCEDTC
	ntr	LCR-SDFAIVGRLMEIIEDQDSGIARFALDDVLKDEkmGLRFFNIKYLEVTLTDMDwnCPCPNMTTeDGPLIIMGEVH----DGMAVLDPNSYVRTANDKRVKKIYE
wfikkn2	kazal_2	S-FTCASDGLTYYNKCYMDAEACTKGI
	i_set	PVLVNNPTHQSVYVGETVSFHCDVTGRPKPEITWEKETENKEKiimrpnHVQGNIVVT-NIAQLVIYNTQLQDAGIYTCTAKNLGGALRVDFPLSV
	kunitz_bpti_1	CLKQPDSEDCGEEQTRWYXXXXXNNCFTFIYGNCNSNLNHFETYESCM
	kunitz_bpti_2	ICSLPALQGHCKAYEPRWAYNSLTKQCQSFIYGGCGGNENNFESREACEESC
	ntr	SFCK-SDFVILGHVMELTEDQESGHALVTVEEILKDDkmGLQFLGKEPLEITLLNMNwsCPCPNITAtEGQLIIMGEVY----NGMAVLQPDSFVGASSVRRIRKLRE
wap	wap_1	KPGVCPYTDAICHG-GPIGNQCKQDDQCPGARKCCPGSCGQACLLP
	wap_2	KLGVCPVQYTVCR---AAFDVCEKDEECPGIKRCCEGNCGTVCRTP
	wap_3	KPKRCPENIIKCPT--KGPYECNNDSECKKNKKCCFLKCALRCVEP
vegfc	pdgf	CMPREVCVDVGKESGATTNIFFKPPCVSIYRCGGCCNSEGLQCMNISASYVSKTLFEI-TVPLSHGPKPVTISFANHTSCRC
	cxcxc_1	NKELDEETCQCVC
	cxcxc_2	NKEFDEEKCQCVC
vegfb	pdgf	CQPKETMVSVTAEHPSLGSHIVIPSCVALSRCAGCCSDDSLHCVPSRSREVILEVMAS----FFPNRYITQLTFEEHLECMC
vegfa3	pdgf	CRPVETMVDIFQEYPDEVEXIFKPSCVALMRCGGCCNDEALECVPTEVYNVTMEIMKL---KPFQSQHIHPMSFQQHSKCEC
vegfa2	pdgf	CRPVETMVDIFQEYPDEVEXIFKPSCVALMRCGGCCNDEALECVPTEVYNVTMEIMKL---KPFQSQHIHPMSFQQHSKCEC
	vegf_c	XHCEP----CSERRKHLYKQDPLTCKCSCKFTDSRCKSKQLELNERTCX
vegfa1	pdgf	CRPVETMVDIFQEYPDEVEXIFKPSCVALMRCGGCCNDEALECVPTEVYNVTMEIMKL---KPFQSQHIHPMSFQQHSKCEC
	vegf_c	XHCEP----CSERRKHLYKQDPLTCKCSCKFTDSRCKSKQLELNERTCX
spsb4	spry	HVWQIHWPtRQRGTHAVVGISTAEAPLHSVGYTslvGSNNESWGWDLGRNKLYhNCKNQPGVTYPVFLEPDesfvlpdSLLVVLDMDEGTLSFIVDGQYLGVAFRGLKGKKLYPIVSAVWGHCE
	socs_box	PLPLMDLCRRSIRFALGRerlhDIESLPLPQSLKNYLQY
spsb3	spry	HFWEIKMTsPVYGTDMMVGIGTSDVNLDKFRHTfcsllGKDEDSWGLSY-TGLLQHKGERNNFST-RFGQGSIIGVHLDTWHGTLTFFKNRKCIGVAATKLQNKRVYPMVCSTaAKSSMKII
spsb1	spry	HVWQITWAmRQRGTHAVVGVATAEAPLHSVGYTtliGNNLEXXXXXXXXXXXXxxxxxxxxXTYPAFLEADETFIVPDSFLVVLDMDEGTLSFIVDGQYMGVAFRGLKGKKLHPVVSAVWGHC
	socs_box	PLMDLSRRSVRLALGKnrlcEIATLPLPKSLKNYLLY
prok2	prokinectin	ACDRDLQCGGGMCCAVSLWIQSLRICTPMGIFGEDCHPLSHKVPFWGRRMHHSCPCEPNLACVRISPSKYKCL
prok1	prokinectin	XDLQCGSGTCCAISLWLRGLRMCTPLGREGDECHPISHKVPFFGKRQHHTCPCLPNLICSKFTDGRYRCS
plaa	wd40_1	CSLTGHeLDVRGLSccLFPTGSFV-SVSRDRTARVW
	wd40_2	EIHCLSGHsNFVSCVCVIPPSDFyphglIATGGNDSNICIF
	wd40_3	KCMMTLQGHtAAVWAVKILPEQGLMLTGSADKTIKLWK
	wd40_4	GRCERTFTGHeDCVRGLAILSETEFLS-CANDASIRRW
	wd40_5	GECLQVYYGHtNYIYCISvFPQSKDFVT-AGEDRSLRIW
	pfu	PGTRDGQTRLIKEA-GKVEAYQWSSSEDKWIKIGDVVGSSGatqqTSGKVLFEGKEYDYVFTIDVNEGGPSYKLPYNITDDPWLTAYNFLQKNDLNPMFLDQVAKFIIDNTKGQ
	pul	FPKKEAVTFDQANPSLILSKMKELNGNVP----EEQQLTEDALDVLEKMLSIMcsvsMETPTreQLKILWKAI-NWPNDFVFPALDILRLAVRHPSVNESFCGEKXGsXXXSHLIKFLSPGGKQ--ANQMLALRTLCNCFIHPVGQKLMLAQGDSIMSQAIELKL----SSNKNIHVALATLALNYAVCLH-KNNNLEGKAQCLSVISTVMEV-VQDLEAIFRLLVALGTLISD--DSNAVQLAKSLGVDSQIKKYSS---ISEPaKVNECC
pla2r1	fn2	CVFPFKHNNKWHYECIRDFREDGYPWCATTSHYEQDEKWGLC
	lectin_c_1	LSWNEARVACQGQGAELLSITDMREQKYIGGLIXxxnTKEAMIWTGLNQLDETAGWQWSDGAPLALV----NWlmdpIDSSLGPAHCKAFNLKIQNDWPSYSCESGLPYVCKK
	lectin_c_2	EKNWNEAFFSCQDDNSTLISITSLADTEMLINLLEyENVTDTWIGLsCNKTPPVEFKWSDGSAITFT----YWnkqePNILQKKGQIXXXXXXQEGRWKVKNCKSRYFYICKR
	lectin_c_3	SLATITSRFEQGFLNSMIHhqgnTDSPYFWIALQDLNNTGEYTWFTEDGKHHLAIYTNWrXXXXXXXXGCVVMrQEEPIGMWEVKNCATfMAKSLCK
	lectin_c_4	KRTWQEAETLCQDFGAHLASFKQVLEEDFLNKLLNtmfhxDDERQFWIGFnkRNPLSGGSWEWSDGTPVSSAFL--EKASIEDNVKNCAAY--KTNGTVFPLHCNSEHEWICK
	lectin_c_5	PSNWDSFQFVCAWLRGDIATIQSSQEQEFIQNRIKkxxKKSSNWWIALHSELPNEEFRWADGSLLS----YQNWagdkeKPKPAEGPKCAFI-SSQTGQWGFANCTTSLPCICKR
	lectin_c_6	KSWHSAQKTCSYYDASLVSVENEVEQAFVAMNLLGHKSNVWIGL---QSDSYEKRLNGQKVE----YANWspaqvrhqnhyiGDTEKKDVLCASIlnypSFSLMGKWYLESCENKNGFVCQK
	lectin_c_7	SMTWNMALQMCKKNGAELVSITDYYHQAFLTVIINRVGYAHWIGLFTSDDGLHFEWSDGTRPF----FTFWgEEDTQSXGHCVYI--DTNGHWKNT
	lectin_c_8	NLNFYEALEFCSRQXXXXXTIKGRDENIFLLEELYsfgSVVEMIWLNTHFLMDNATVIWFDGSPVQ----YSNWgtkepEVSQWKGNSCIVL-TTADGIWKLLPCHEKKGFVCK
pla2g15	lcat	YF--TLWLNLELLLPLIIDCWIDNIRLVYNRTSGSTAPPDGVDIKVP-GFxktFALEFLDPSKRSVGTY--FYMLVQKLVDLGYQRDESIRGAPYDWRKAPXENGDYFEAFQKLIEIMYEAYGEPVVLIAHSMGNMYSLYFLSH-QSQEWKDKYIRDFVSLGAPWGGVAKAFRVLASGDNNRIPVISSFKIRDQQRSAVSTSWLLP-------YNYTWSPEKIFVSTPSANYTIRDFQKFYED-----------IGFEDGWLMRKATEALIYSMT------------------------PPGVRTHCLYGTGVNTPVSFFYDSL--------------PDKEPKIFYGNGDGTVNLESALQCQKWV-GQQKQKVILYEL----PGCEHIEMLYN
pla2g12b	pla2g12	XIPAMTKCCNQLDACYDTCGSNKYRCDAKFRWCLQSICSDLKRSLGFVSKVExACESIADTIFQTVRTLGCRPFMNSQRSACICNEEEREEL
ngf	ngf	NQGEFSVCDSVSVWVANKTTATDMRGNVVTVMVDVNLNNNVYKQYFFETKCK-NPNPVPSGCRGIDAKHWNSYCTTTDTFVRALTMERNQASWRFIRINTACVCVISRKN
npr3	anf_receptor	VRPAIEYAVRSLEANGSLLPAGyKFRLFYSDSDC----GNRALFSLVXXXxxxxxxPDLLLGPVCDYAAAPVARLASHWNLPMISAGALAAGFSPKTgEYSHLTRVSPGYAKMGEMFLALFRHHKWTRVLLVYHDDKEQRGCFFAAEGvhlVFREAGLHLDDFAFEEsgKYADEAVRAI----QGGERGVIMCASSDAIRNIMLAAHRQGMTSGDHAFFnielfnsssyGNGS----------WrrgdkydLEAKQAYSSLQTVTLLRTLKPEFEKFSMEVKSS--VQKQGIHRGDY-VNMFVEGFHDAIVLYVLALREVLKN------------GfTKKDGDKIVHQTWNRTYEGIAGPVSIDASGERFGDFSVVAMTD
npr2	anf_receptor	QSEGMTNGDYVFFYVDXFGESLQGDGHQgaakpwqskegqdsGTLREAFQXXXXXXXXXXQTSEYRNFQ-NQVILRARQHYQVELSDSLXXXXAGCFYDGLFLYALALNETL---------HEGD-TKLNNS-RILEKMKGXXXXXXTGIVSMDQNNDRD
	pkinase_tyr	XXACIDPPNICIVTEYCPRGSLQDILENE--SINLDWMFRYSLINDIXXXXXXXXXxXXXXXXSLKSSNCVVDSRFVLKIXXXXXXXXX-XXXXXXXXXXXXXXKLWTAPELLQKGTlhllppAIQKADVYSFGIILQEIALRSSAFYVEGielSPKXxxxxxXXXXXXXXXXXXXXXXXXXXXGVLMERCWAQHPAERPDFAQIK
	guanylate_cyc	VQAEAFDCVTIYFSDIVGFTSLSAESTPMQVVTLLNDLYTCFDAIIDNFDVYKVETIGDAYMVVSGLPvRNGKLHAHEIVRMALALLEAVKTFRIRHrpSEQLCLRIGVHSGPVCAGVVGLKMPRYCLFGX
npr1	anf_receptor	RVGPAVELAIQKLNAQPDLLPEHQVQMVFgssENGQgvCSDIMAPLAAVDLKLAhSPHAFVGPGCVYPTAPVARYTRHWNLPLVTAAAEAIGFSNKEDeFALVTRTGPSHGKLGDFGVSLSQHFNWTSRAMLLYWDnNLDDRPCFFAAEglymqLPSLQNITIEDVPXXX-XXXXXXXXX---XXXXXXXVYVCCAPDIFRALMLQAHREGLTTGDYAFFYIDLFGTSLRSSTFPdrtrpwrrgdgddGAAREAYKAVMLITYAEPQNPEYRLFLQHIKRTSQEQFNFTVEDGL-VNFIAGAFHDGVMLYAQAVNETLAQG
	pkinase_tyr	XVKHMSRKRI-DLTRNVLFELKHMRDVQNKHLTRFIGAXXXXPNICILTEYCIRGSLQDILEND----SITLDWMF
	guanylate_cyc	VQAEAFDSVTIYFSDIVGFTALSAESTPMQVVALLNDLYTCFDAIIDNFDXXXVETIGDAYMVVSGLPvRNGRLHAREISRMSLALLEAVRNFKIHHrpEQQLKLRIGIHSGPVCAGVVGLKMPRYCLFGDTVNTASRMESNGEALKIHLSAATKAILEeFGCFELDLRGDIEMKGKGKLRTYWLM
kunitoxin	kunitz_bpti	XXGPCKAKVRAFYYNPASKKCEEFTYGGCEGNANNFKTKDECHYTC
klkb1	pan_1_1	CMTEIYRNTYIEGGDISRVYTPTADYCQLVCTYHPR--CLLFSYVPGswvkttaRFSCFLKEIDAQE-LPKIHR-EGVISGHSQkQC
	pan_1_2	KVYEGLDMQGENYNITTADNYHHCQQRCTNDKH--CYFFTYTLEsfhsvplRNKCYLKYSSTGT-PNQIRQLRDVISGF
	pan_1_3	CQMDLFQHFAFSGITVAKILTPDKFVCRTVCTYRPN--CLFFTFLSSewevkseRYTCLMMTSRSEK-PEKITERANVISGFSLlNC
	trypsin	VVGGSNSSAGEWPWQVSLHTVLPvqSHQCGGSIISDQWILTAAHCFKNfqlTEHWHIYSSIlKQSEMTNET-AFFKVQKLIIHPRYEFTETGYDIALLKLDRPMNFSALQQPICLPSEEEINMAYTECWVTGWGYTEERGsITDMLQKVKIPLIPNAECQFQYPEHtITDKMLCAGYSXXXXXXXQGDSGGPLSCKFEnswYVVGITSWGEGCARPGQPGVYTNVAKFVDWI
klk14	trypsin_1	XKVCLGKHNLKKVEPTEQCVDVAQAIPHPEYNKKKMNKDYMLIRLKP
	trypsin_2	PAKMQCANVSIVPSKQCNKAYSGKITSHMLCAGVPQXXXXXXXGDSGGPLVCNGL-VEGVVSWGtFVCAQRGNPGVYXXXXXXXXWI
f5	cu-oxidase_3_1	LLGPTLRGEVGDILIIYFKNFATQPVSIHPQSAVYNKwsexXXXSDGTSEIErlDDAVPPGQSFKYVWNXXXXXXxxeadppclTYAYYSHVNLvRDFnSGLIGALLICK
	cu-oxidase_3_2	KPT-YTTWSKERGILGPVIRAEVRDTISIVFKNLATRPYSIYVHGVSVSKDAEgaiypSDSKENITQgKAVQPGEVYTYKWTVldtdeptakDSQCITKLYHSAVDMtRDIaSGLIGPLLVCK
	cu-oxidase_3_3	LLGPLIRAEIDDVIQIQFRNKASRPYSLHAHGLLYEKSsegrSYDDQSPefFKKDDAIMPNGTYTYVWHVTKRSG
	f5_f8_type_c_1	QINASDH-VGYWePKLARLNnaG---KynAWSiIKKENEHPWIQVDLQRQVVITGVQTQGAKQLMkSLYTVEYFVTYSKDGQKWITFKGkhpktQMVfEGNSDGTKVKDNHIDPPIIARYIRLHPTKFYN
	f5_f8_type_c_2	ITASSYkktWLSSWePSLARLNlkG--RTnAWLPKVNXXDQWLQIDLQQLTKITSIITQGATSMStEMYVKTFSIHYTDGNSSWKPYLDvctsmEKVfTGNINSNEQVKHFFKPPILSRFIRIIPKTWNQY--IALRIEL
edn3	endothelin	RAKRCTCYTYKDKECVYYCHLDIIW
edn1	endothelin	RVKRCSCYSLMDKECVYXCHLDIIWINTP
csta	cystatin	XIKSQLEEKE-SRNFTTFNAISYKTQVVAGINYFIK
cpamd8	a2m_n_2	IQLQMPDRPFLVGEEACIAVKSTC--PCNFTLhYEVVSRGNIVLSXxxprnktwegsK--RtataassxxxsssapelNTCTT-SICFSVIPNMAPLGRLLAYYVRENGEGVADNMQFAVKPFFENQVSVAF-SANETRPGDSISVTVRAAKGSCVCLATVDKSIYL
	a2m	XXSDVSGEAQLRVEVPDSITTWVMEAVGLSER-GLGLARQTELKTFKPFFIEFTLPYHIIRGEQAKIPXTVHNYLPMCLEVHVK
	methyltransferase_FA	HIALSSAPHD--MAEMTEIVIGGHQNSKTWISTSKMGEPVASTETVGILSWDEFRSFWISWA-HGVIQVGHGpfxXNESIIVTWSTSKQPEVKYIGFSTgWGSAG
	thiol_ester_CL	NLDNLLQLPFGCGEQNMIHFAPNIFVLKYL
	A2M_comp	QGYQRQLTYKRQDGSYSAFgERDSSGSMWLTAFVLKSFAQSREFIFIDPKELLAAKDWIIQHQKEDGSFPALGRILNKDIQGGVHGKISVTAYVXXALLETGVI---SEEEKGAVTKAQHFLESN-TYSVEDPYTIVLTTYALTLL-RSPSASAALRKMNGIAITQDGFTHWNIMGTLATGEDTFMGFsdglsqXXXXAEVEMTAYALLTYTVL-GDVASALPVVKWLSQQRNALGGFSSTQDTCVALQALAEYA
	A2M_receptor	SNMAVLEVPLFSGFRADIESLEKLLTNKQIGLKRYE-VDGRKVLFYFDE
clec19a	lectin_c	NKTWAEADLYCAEfsiglKSAKLXXXXSWEENVFVYDLVNsrvpGIPTDIWMGLNDLRQESNFEWTDGSPYDYNY----WdgnqpddgIHAIPEEEDCVQIwyrYSSXXXXXXXXXCSREFPFVCK
clec16a	fpl	IRSITEILIWGDQNDSSVFDFFLEKNMFVFFLNILRQKSGRYVCVQLLQTLNILFENISHETSLYYLLSNNYVNSIIVHKFDFSDEEIMAYYISFLKTLSLKLNNHTVHFFYNEHTNDFALYTEAIKFFNHPESMVRIAVRT
clecl11a	lectin_c	YNAAQKLCEARGGHLAMPVDDTELAVLRRYLYdafqPYNWPAWIGIHDRRSEGLWLFENGQRVSVFDWYRDHlvtQPNGGTRENCVSL-SSDDGKWWDNDCERRMYYICEY
clec3b	lectin_c	AKTYHEASEDCISQGGTLSTPQTGDENDALYDYVRktlGNEAEIWLGI--NDLAAEGKWVDMTSNSIS--YKNWeteittQPDGGKQENCAALSAVAVGKWFDKRCRDQLLYVCQF
clec3a	lectin_c	XXWLGITDMVNEGKFVDVNGMVLN----YFNWdrlQPNGGKRENCVLFSQPGQGKWGDEVCRTVKRYVCEF
adam19	pep_m12b_propep	KLNLYRW-YLFAPDYTETHYTKTGTAQTISLNKTDNCFYHGRVRAIRESXXXXXXXXXXXGLILISNNiSYVLEPLP------DSQEQHLIY
	reprolysin	XXTKKKLVEAANYVDKFYRSLNIRIALVGLEVWNDYNKCDISENLHSTLWSFLAWRRRLLI-HKKHDNAQLITGMSYGT-TIGLAPLMAMCSAYQSGXXXXDHSENAIGVAATMAHEMGHNFGMNHDSDGCCFASpRDGGCIMAAATGAPFPRVFNECNRKELERYLQSGGGMCLYNMP
	disintegrin	EEGEECDCGEVEECH-NPCCNAADCTLKQGAECAHGICCQ-KCKLVSPGTLCREQART-CDLPEFCSGKSPFCPA
	adam_cr	DGTPCENgrAYCYNGMCLTYEQQCLQLWGYGARPAPDLCFEKVNAAGDSYGNCGKDITGNYRKCDTRNAKCGKIQCQSSASKP-VESNAVAIDTTIKlNGReihCRGTHVYlnEE
adam17	reprolysin_5	KNTCKMLVVADHRFFKNMGRgEEsTTINYLIELIDRVDDIYRNTSwdnahfnGYGVQIEQIIVHSEPENLPPKQkhynmaksqpdeEKDAWEVKQLLEQF--SYDIAEKAATVCLAHLFTYQDFDMGtLGLAYVASQKPNSHGGICPXAYSNSvpgkavylnsgltstknYGKTILTKEADLVTTHELGHNFGAEHDPDSM---LECAPN---EDQGGKYVMYPIAV
	disintegrin	DEGEECDPG-LLNLQNDLCCT-SDCKLKPNAKCSDrnSPCCK-RCQFESADKKCQEAINATCKGESYCTGNSSDCPP
	adam17_mpd	FCEWEkSLRSCAXXETDNSCKICC-RDEFGRCSPYRDINQNFLYLRKGKPCTVGFCDMNGKC
ache	coesterase	ELKVATQTGWVRGLRTPVLNG-HVSAFLGIPFAEPPVGRLRFLRPEPVKAWQHVLXXXXXXXXXXXXXXXXYPGFHGTEMWnpnreMSEDCLYLNIWVPS--PRPK-NVSVLVWIYGGGFYSGSASLdvYDGRFLTYTQNVILVSLSYRVGAXGFLGLlGSQEAPGNMGLLDQRLALQWIQNNIQHFGGNPKAVTIFGESAGAASVGMHLLSSQSRALFQRAILQSGAPNAPWATVTPAEXXXXXXXXXXXXxxXXXXDSELVSCLRSKSPQQLIDEEWSVLPYKSIFRFPFVPVIDGDFFPDTPEAMLGTGNFKETQVLLGVVKDEGSYFLIYGVPG-------FSKDNDSLISRQDFLEGVRmgvphaNDIATEAVVLQYTDWQDEDNREKNREAMD…
adam11	adam_cr	DGYFCDNeqGRCYGGRCKTRDRQCNALWGR—ASAERFCYEKLNVEGTERGNCGHE-GSRWMPCVKQDVLCGYLLCANAT
	reprolysin	KFIELIIVNDHQLXXQMRRSVSLTSNFAKSVVNLADVXFKEqLNTRIVLVAMETWASGDKIQTDEDSLETLREFMKYRQESLPEHS--DAAHLFSGHTFRSSRSGTAYVGGICSVARGGXXXXYG--TVGAMAVTLAQTLGQNIGMMWNKHrasaGDCRCPdLWLGCIMED-TGYYLPRKFSRCSVDEFNQFLAEGGGSCLFNKP
	pep_m12b_propep	EITYPSRLMKrnsGGEIQSYQLDTTVRKETGGSRGDDrkggspvihLAQVSFLIPAFGLTFTXXXXXXXHLLSLNYVERHF-GXXXXXXXXXGTSEHCYYQGNLRGEANSFVALSTCHGLXGVFSDGKDVYLLKPHDSLEHQXQEPLPHQIY
adam23	pep_m12b_propep	AvhLAQASFQIEAFGSTFILDLSLNNDLLSADYVEIHYEDDKP---QYSKGGEHCYYHGSIRGIPKSKAAISTCNGLHGMFEDNTYVYLIEPLELTHSXSSTGRLHVI
	reprolysin	KYLELMIVNDHKMFRKHRSSHSNTNNFAKSVVNLVDAIYKEqLNTRVVLVAVETWSDRDRIRVHSDPRQMLHDFSRYRQNFIKQHA--DAVHLLSYXXFHYKRSSLSYFGGICSVARGVGVNEYG--LSWAIAQELSQSLAQNLGIQWEPAsRKPXXXxxXXXXXXXXXXXXVYHSRKFSKCSIAEYRDFLLRGGGFCLFNRP
	disintegrin	EPGEDCDCGIQTXX---XXXXXKKCSLSNGAHCSDGPCCNETCLXXXXXXXXXXXXN-ECDITEICTGDSGQCPP
	adam_cr	DGFACDSnqGRCYNGECKTRDNQCKFIWGNKASGSHKHCYEKLNTEGTQKGNCGKD-GDKWIPCHKHDVFCGLLLCANLDGVPRIGHLqGEIIPTSFFhQXXxxxCSCAHVLLDDETD
crisp	cap	DLHNSLRrsvtpTASNMLKMEWYPEAAANAERWAFRC----ILNHSPYNSRVIXXXKCGEN-LFMSSHPSPWTRVIQLWYDEYKNFKYGVGANPPnavIGHYTQVVWYKSYLVGCAAARCPSSSYNYFYVCH
	crisp	NPCRHENVFSNCNDLVKHQGCQNNNMKSNCPGSCFCRNEI
serotriflin	cap	DLHNSLRrsvtpTASNMLKMEWSSNAAQNAKRWADRCSFAHSPQHLRTMGKLKCGENLFMS-----SHPSPWTRVIQLWYDEYKNFKYGVGANPPnavIGHYTQVVWYKSYLVGCAAARCPSSSYNYFYVCHY
	crisp	NPCRHENVFSNCNDLVKHQGCQNNNMKSNCPGSCFCRNEI
pla2g12a	pla2g12	CQEPETPDWRMTLKTIRNGVHKIDTYLNAALDLLGGEDGLCQYKCSDGYKPLPRYGYKPSPPNGCGSPLFGVHFDIGIPSMTKCCNQHDRCYDTCGSKKHDCDEQFQYCLSKICRNVQKTLGIPESVQXXXXXXXXVFDALIHLGCKPYLDSQRAACMCQYEVNRDL
pla2g1b	phospholip_A2_1	AcrflldNPYTKTYSYTCSGGXXXXXXX--KGACAAFICNCDRSAALCFAR--APYNKEYK
pla2g10	phospholip_A2_1	ILQLAGMIQCTTGRTPLAYIRYGCYCGWGGRGWPKDQVXXCCFKHDCCYGRAEEHSCAPKTWWYPWECQDGKAKCDDI--EDKCQKMACECDRSAAKCLAK--APYNMTY
pla2g3	phospholip_A2_2	VPGTLWCGAGHSAQXXXXXGVFQGPDVCCREHDTCDAHISALGFKYGIRNYHLHTISHCNCDNRFRDCLRNLNDTISNFIGNSFFNLLEVPCFY
	phospholip_A2_2	ETWQGERDSAgQAYKPKPALSRRCRCYQRLDQCPFQIGPREFKYQLHNADDRTLFHCNCTR
pla2g4a	c2	DTPDPYVELFIstAPDSRKKTKHINNNVNPEWNETFEIILDPNQENILEITLMDANY-VMDETIGTATFPISSLKIGEKKQ
	pla2_b	IAILGSGGGFRATXXXSGVMKALY--------ESGILDCATYIAGLSGSTWXXXXX-----XXXXDFPAKgPKEINVELRNSISHTPLKLLTPQKVKRY---IEALWKKKRSGQPVTFTDIFGMLIGETLIQ---NRMDITLSHMR--AKINKAQSALPLFTCLHVKPDVSELMF-ADWVEFSPYEIG--MAKYGTFMTPNLFGSKFFMGTVVKNYKENPLHFLMGVWGSAFAILINRVLGVSNSHNkgptMEEELENIRLRQIVSNDSDSDDESQGLKGXEXXXXEISHEQTSQeswvqrmfmALVGESALFTTREGRAGkvHNFMLGLNLNTCYPLSPFIGVNTQDSVEDDEMDtAVTXPDEFDRIYEPLDVKSKKIHVVDSGLTFNLpYPLILRP-…
pla2g4c	pla2_b	IAVLGAGGAMRAMIALYGTLVELR----NYN----LLDCVMYLGGVSGSTWCLPTLYKN-----EDWSE-----KIENLSKCQFEN----LVQGQWDFNKAMKAVQEAIE-DECYSLTDFWSYFLVHKLLN---KVGEKQLSEHA--GSCENGKNPYPIYAAVNKQTYENQ-DV-GTWFEFTPHEVG--IPGLGAYVDSKYFGSIFKNGQLIRKKEEKN
pla2g6	Ank_2_1	LHLACQKGDFECLKELMeeCHARVDltDkNGETVFHYAVRGSNPKIIELLGKKAtvaldhLNDEGQSPLHLACQLGKEDAVYSLLKVQAKCN
	Ank_2_2	AEMTRMLIeYGCEVNalSaSGESALHIAVRRGRLDCTMVLLTHgAmpntKEKNGNTPLHLAMQXXXXXXXKALIVFGADVDI
	patatin	LSLDGGGVRGIVLIQFLIAIekaaGRPISELFDWVTGTSTGGILALAIIQGKPMDYMRCVYFRMKDEVFRG----------------------SRPYESEPLENFLKKEFGEHTKMTDIKSPKVMLTATLcdrqpAELHLFRNYSPPEGRNRSRFRMMGS--FQPMTKPEXXXXXXXXXXSGAAPTYFRPVGR----FLDGGLLANNPTLDA
pla2g7	PAF-AH_p_II	MRIPEGKGPYSVGCTDLMTGYGIQGSFLRLYYPS-QNDMNYEDTKWIPNKEYYSGLSHFLNMYWIIGEFILARYFGSVTSPATWNAEFKTGEKYPLXXXXXXXXXXRTLYSAICIEMASQGFVVASVEHRDQSSSATYYYKENPTIGAK-GNPPALHKEWIFYRKLKPdENXXXXXXXXVQQRAEECIRALNLLLEINSGNPIKNILPLNINWSLLKDSIDLQKIAAMGHSFGAATVIETLSKDARFXXXXXXXXXXXPLSDEVYPKVHQPLLFINSEKYQWASNILEMKKLNYKGRERKMITIEGSVHQSFSDFTFLTGNIIGKIFKLKGDIDPQTAIDISNKASLAFLQKHLSLSKYFNKWDPLLNGEGPNV
crotasin	-	-
vegff	pdgf	XXSHIFKPSCVILWXCASCCNDDSLKCXXX
