# Supplementary material for: Comparative analyses of putative toxin gene homologs from an Old World viper, Daboia russelii
Source: PeerJ. 2017 Dec 5;5:e4104. doi: 10.7717/peerj.4104 (PMC5721910; doi:10.7717/peerj.4104)
Supplement: Supplemental Information 6 [file peerj-05-4104-s006.xlsx]

## Sheet: Lookup_Table
Table S4: Accession IDs and taxonomic groups of species used in all comparative analyses.
			Query_ID in Graphical Summary
Accession ID	Species Name	Taxonomid Grp	Supplementary File 5 (NGF)	Supplementary File 5 (PDGF)	Supplementary File 5 (Kunitz BPTI)	Supplementary File 5 (CAP)	Supplementary File 5 (CRISP)
ACC85797.1	Acrochordus granulatus	Acrochordidae	Query_222881
ACC85797.2	Acrochordus granulatus	Acrochordidae	Query_222882
ACC85797.3	Acrochordus granulatus	Acrochordidae	Query_222883
ACC85797.4	Acrochordus granulatus	Acrochordidae	Query_222884
ACC85797.5	Acrochordus granulatus	Acrochordidae	Query_222885
ACC85806.1	Boa constrictor	Boidae	Query_234571
ACC85808.1	Calabaria reinhardtii	Boidae	Query_234568
ACC85816.1	Eryx colubrinus	Boidae	Query_234570
ACC85826.1	Lichanura trivirgata	Boidae	Query_234569
A7X3V4.1	Telescopus dhara	Colubridae			Query_162665
AAZ75605.1	Rhabdophis_tigrinus	Colubridae				Query_66232	Query_57380
JAS04558.1	Boiga irregularis	Colubridae		Query_11110
JAS04573.1	Boiga irregularis	Colubridae			Query_162667
JAS04574.1	Boiga irregularis	Colubridae			Query_162670
JAS04593.1	Boiga_irregularis	Colubridae				Query_66233	Query_57381
JAS04594.1	Boiga_irregularis	Colubridae				Query_66234	Query_57382
JAS04595.1	Boiga_irregularis	Colubridae				Query_66235	Query_57383
JAS04596.1	Boiga_irregularis	Colubridae				Query_66236	Query_57384
Q2XXP4.1	Trimorphodon biscutatus	Colubridae				Query_66237	Query_57385
Q2XXP5.1	Telescopus dhara	Colubridae				Query_66238	Query_57386
Q2XXQ4.1	Dispholidus typus	Colubridae				Query_66239	Query_57387
Q2XXQ5.1	Dispholidus typus	Colubridae				Query_66240	Query_57388
Q2XXQ6.1	Dispholidus typus	Colubridae				Query_66241	Query_57389
Q8JGT9.1	Rhabdophis tigrinus tigrinus	Colubridae				Query_66242	Query_57390
XP_013908306.1	Thamnophis_sirtalis	Colubridae				Query_66243
XP_013910725.1	Thamnophis sirtalis	Colubridae			Query_162674
XP_013911375.1	Thamnophis_sirtalis	Colubridae				Query_66244
XP_013911377.1	Thamnophis_sirtalis	Colubridae				Query_66245
XP_013911763.1	Thamnophis_sirtalis	Colubridae				Query_66246	Query_57391
XP_013911769.1	Thamnophis_sirtalis	Colubridae				Query_66247
XP_013911871.1	Thamnophis sirtalis	Colubridae			Query_162668
XP_013912227.1	Thamnophis sirtalis	Colubridae			Query_162672
XP_013912228.1	Thamnophis sirtalis	Colubridae			Query_162673
XP_013914971.1	Thamnophis_sirtalis	Colubridae				Query_66248
XP_013915640.1	Thamnophis_sirtalis	Colubridae				Query_66249
XP_013915979.1	Thamnophis_sirtalis	Colubridae				Query_66250
XP_013916740.1	Thamnophis_sirtalis	Colubridae				Query_66251
XP_013916935.1	Thamnophis sirtalis	Colubridae			Query_162669
XP_013917933.1	Thamnophis sirtalis	Colubridae			Query_162666
XP_013920310.1	Thamnophis_sirtalis	Colubridae				Query_66252
XP_013920715.1	Thamnophis sirtalis	Colubridae			Query_162671
XP_013922516.1	Thamnophis sirtalis	Colubridae		Query_11111
XP_013925649.1	Thamnophis_sirtalis	Colubridae				Query_66253
KYO28364.1	Alligator mississippiensis	Crocodylia			Query_16110
KYO28364.2	Alligator mississippiensis	Crocodylia			Query_16111
XP_006024680.1	Alligator sinensis	Crocodylia			Query_16106
XP_006024680.2	Alligator sinensis	Crocodylia			Query_16107
XP_006030539.1	Alligator sinensis	Crocodylia			Query_16088
XP_006030539.2	Alligator sinensis	Crocodylia			Query_16089
XP_006035847.1	Alligator sinensis	Crocodylia			Query_16079
XP_006035847.2	Alligator sinensis	Crocodylia			Query_16080
XP_006035866.1	Alligator sinensis	Crocodylia			Query_16087
XP_006270415.1	Alligator mississippiensis	Crocodylia			Query_16104
XP_006270415.2	Alligator mississippiensis	Crocodylia			Query_16105
XP_014383204.1	Alligator sinensis	Crocodylia			Query_16092
XP_014460157.2	Alligator mississippiensis	Crocodylia			Query_16090
XP_014460157.3	Alligator mississippiensis	Crocodylia			Query_16091
XP_019338329.1	Alligator mississippiensis	Crocodylia			Query_16093
XP_019338329.2	Alligator mississippiensis	Crocodylia			Query_16094
XP_019338516.1	Alligator mississippiensis	Crocodylia			Query_16083
XP_019338516.2	Alligator mississippiensis	Crocodylia			Query_16084
XP_019348769.1	Alligator mississippiensis	Crocodylia			Query_16085
XP_019348769.2	Alligator mississippiensis	Crocodylia			Query_16086
XP_019348777.1	Alligator mississippiensis	Crocodylia			Query_16081
XP_019348777.2	Alligator mississippiensis	Crocodylia			Query_16082
XP_019352148.1	Alligator mississippiensis	Crocodylia			Query_16102
XP_019352148.2	Alligator mississippiensis	Crocodylia			Query_16103
XP_019374568.1	Gavialis gangeticus	Crocodylia			Query_16108
XP_019374568.2	Gavialis gangeticus	Crocodylia			Query_16109
XP_019374569.1	Gavialis gangeticus	Crocodylia			Query_16100
XP_019374569.2	Gavialis gangeticus	Crocodylia			Query_16101
XP_019395363.1	Crocodylus porosus	Crocodylia			Query_16095
XP_019407675.1	Crocodylus porosus	Crocodylia			Query_16098
XP_019407675.2	Crocodylus porosus	Crocodylia			Query_16099
XP_019407676.1	Crocodylus porosus	Crocodylia			Query_16096
XP_019407676.2	Crocodylus porosus	Crocodylia			Query_16097
KYO34390.1	Alligator_mississippiensis	Crocodylia				Query_69802
KYO34392.1	Alligator_mississippiensis	Crocodylia				Query_69803	Query_59933
KYO48391.1	Alligator mississippiensis	Crocodylia	Query_243290
XP_006025735.2	Alligator sinensis	Crocodylia					Query_59934/5
XP_006025740.1	Alligator_sinensis	Crocodylia				Query_69804
XP_006035799.1	Alligator sinensis	Crocodylia	Query_243287
XP_006260812.1	Alligator mississippiensis	Crocodylia	Query_243288
XP_006267458.1	Alligator_mississippiensis	Crocodylia				Query_69805
XP_006271962.1	Alligator mississippiensis	Crocodylia		Query_40966
XP_014372872.1	Alligator sinensis	Crocodylia		Query_40967
XP_019346880.1	Alligator_mississippiensis	Crocodylia				Query_69806	Query_59936
XP_019346886.1	Alligator_mississippiensis	Crocodylia				Query_69807	Query_59937
XP_019369667.1	Gavialis gangeticus	Crocodylia	Query_243291
XP_019376495.1	Gavialis_gangeticus	Crocodylia				Query_69808	Query_59938
XP_019376496.1	Gavialis_gangeticus	Crocodylia				Query_69809	Query_59939
XP_019376497.1	Gavialis_gangeticus	Crocodylia				Query_69810
XP_019382249.1	Gavialis gangeticus	Crocodylia		Query_40968
XP_019392697.1	Crocodylus_porosus	Crocodylia				Query_69811
XP_019392698.1	Crocodylus_porosus	Crocodylia				Query_69812	Query_59940
XP_019392699.1	Crocodylus_porosus	Crocodylia				Query_69813	Query_59941
XP_019402316.1	Crocodylus porosus	Crocodylia	Query_243289
XP_019405216.1	Crocodylus porosus	Crocodylia		Query_40969
A59218	Naja kaouthia	Elapidae
A6MFK9.1	Demansia vestigiata	Elapidae				Query_168391	Query_110308
A6MFL4.1	Demansia vestigiata	Elapidae			Query_235327
A6MFL5.1	Demansia vestigiata	Elapidae	Query_88625
A6MFL6.1	Demansia vestigiata	Elapidae	Query_88626
A6MFL7.1	Demansia vestigiata	Elapidae	Query_88624
A8S6B6.1	Austrelaps superbus	Elapidae				Query_168392	Query_110309
AAB24917.1	Oxyuranus scutellatus	Elapidae			Query_235238
AAL30068.1	Bungarus candidus	Elapidae			Query_235261
AAL30069.1	Bungarus candidus	Elapidae			Query_235296
AAL30070.1	Bungarus candidus	Elapidae			Query_235280
AAP81292.1	Ophiophagus_hannah	Elapidae				Query_168393	Query_110310
AAZ75602.1	Oxyuranus_microlepidotus	Elapidae				Query_168394	Query_110311
ABK63575.1	Tropidechis_carinatus	Elapidae				Query_168395	Query_110312
ABK63576.1	Cryptophis_nigrescens	Elapidae				Query_168396	Query_110313
ABO31437.1	Oxyuranus scutellatus	Elapidae			Query_235232
ACC77765.1	Oxyuranus scutellatus	Elapidae			Query_235233
ACC85824.1	Laticauda colubrina	Elapidae	Query_88649
ACC85830.1	Micrurus fulvius	Elapidae	Query_88650
ACC85831.1	Naja kaouthia	Elapidae	Query_88648
ACC85833.1	Notechis scutatus	Elapidae	Query_88651
ACE73577.1	Bungarus_candidus	Elapidae				Query_168397	Query_110314
ACE73578.1	Bungarus_candidus	Elapidae				Query_168398	Query_110315
ACN93671.1	Ophiophagus_hannah	Elapidae				Query_168399	Query_110316
ACR78497.1	Drysdalia coronoides	Elapidae			Query_235243
ACR78498.1	Drysdalia coronoides	Elapidae			Query_235236
ACR78499.1	Drysdalia coronoides	Elapidae			Query_235240
ACR78500.1	Drysdalia coronoides	Elapidae			Query_235234
ACR78501.1	Drysdalia coronoides	Elapidae			Query_235284
ACY68697.1	Parasuta nigriceps	Elapidae			Query_235309
ACY68698.1	Parasuta nigriceps	Elapidae			Query_235267
ACY68699.1	Parasuta nigriceps	Elapidae			Query_235285
ACY68700.1	Parasuta nigriceps	Elapidae			Query_235257
ACY68701.1	Parasuta nigriceps	Elapidae			Query_235286
ACY68702.1	Parasuta nigriceps	Elapidae			Query_235320
ACY68703.1	Parasuta nigriceps	Elapidae			Query_235298
ACY68704.1	Parasuta nigriceps	Elapidae			Query_235291
ACY68705.1	Parasuta nigriceps	Elapidae			Query_235283
ACY68706.1	Parasuta nigriceps	Elapidae			Query_235288
ACY68707.1	Parasuta nigriceps	Elapidae			Query_235306
ACY68708.1	Parasuta nigriceps	Elapidae			Query_235287
ACY68709.1	Parasuta nigriceps	Elapidae			Query_235308
ACY68720.1	Parasuta nigriceps	Elapidae		Query_233394
ACY68722.1	Parasuta_nigriceps	Elapidae				Query_168400
ACY68723.1	Parasuta_nigriceps	Elapidae				Query_168401	Query_110317
ACY68724.1	Parasuta nigriceps	Elapidae	Query_88619
ADF50025.1	Bungarus flaviceps	Elapidae			Query_235259
ADF50026.1	Bungarus flaviceps	Elapidae			Query_235272
ADF50028.1	Bungarus flaviceps	Elapidae			Query_235295
ADF50029.1	Bungarus flaviceps	Elapidae			Query_235290
ADF50030.1	Bungarus flaviceps	Elapidae			Query_235313
AEH59578.1	Bungarus fasciatus	Elapidae	Query_88617
AEH59581.1	Walterinnesia aegyptia	Elapidae	Query_88631
AHZ08820.1	Micropechis_ikaheka	Elapidae				Query_168402	Query_110318
AHZ08821.1	Micropechis_ikaheka	Elapidae				Query_168403	Query_110319
AOS50876.1	Pseudechis papuanus	Elapidae	Query_88640
AOS50880.1	Pseudechis_papuanus	Elapidae				Query_168404	Query_110320
B2KTG1.1	Bungarus fasciatus	Elapidae			Query_235278
B4ESA3.1	Bungarus multicinctus	Elapidae			Query_235294
B4ESA4.1	Bungarus multicinctus	Elapidae			Query_235266
B5G6G6.1	Pseudechis porphyriacus	Elapidae			Query_235270
B5KF95.1	Cryptophis nigrescens	Elapidae			Query_235323
B5KF96.1	Cryptophis nigrescens	Elapidae			Query_235304
B5KL30.1	Oxyuranus scutellatus scutellatus	Elapidae			Query_235305
B5KL32.1	Notechis scutatus scutatus	Elapidae			Query_235303
B5KL33.1	Tropidechis carinatus	Elapidae			Query_235273
B5KL35.1	Cryptophis nigrescens	Elapidae			Query_235317
B5KL36.1	Cryptophis nigrescens	Elapidae			Query_235322
B5KL37.1	Cryptophis nigrescens	Elapidae			Query_235316
B5KL38.1	Austrelaps superbus	Elapidae			Query_235310
B5KL39.1	Austrelaps superbus	Elapidae			Query_235250
B5KL40.1	Austrelaps superbus	Elapidae			Query_235264
B5KL41.1	Austrelaps superbus	Elapidae			Query_235282
B5L5M7.1	Austrelaps superbus	Elapidae			Query_235237
B5L5Q8.1	Pseudechis australis	Elapidae			Query_235276
B5L5R0.1	Pseudechis porphyriacus	Elapidae			Query_235269
B5L5R1.1	Pseudechis porphyriacus	Elapidae			Query_235281
B5L5R4.1	Notechis scutatus scutatus	Elapidae			Query_235258
B5L5R7.1	Hoplocephalus stephensii	Elapidae			Query_235277
B6RLX2.1	Ophiophagus hannah	Elapidae			Query_235312
B7S4N9.1	Oxyuranus scutellatus scutellatus	Elapidae			Query_235231
C1IC50.1	Walterinnesia aegyptia	Elapidae			Query_235229
C1IC51.1	Walterinnesia aegyptia	Elapidae			Query_235289
C1IC52.1	Walterinnesia aegyptia	Elapidae			Query_235256
C1IC53.1	Walterinnesia aegyptia	Elapidae			Query_235254
E7FL11.1	Pseudechis rossignolii	Elapidae			Query_235315
E7FL12.1	Pseudechis rossignolii	Elapidae			Query_235274
E7FL13.1	Pseudechis rossignolii	Elapidae			Query_235301
ETE56771.1	Ophiophagus hannah	Elapidae	Query_88645
ETE56995.1	Ophiophagus hannah	Elapidae			Query_235245
ETE57835.1	Ophiophagus hannah	Elapidae			Query_235230
ETE58161.1	Ophiophagus_hannah	Elapidae				Query_168405	Query_110321
ETE61766.1	Ophiophagus hannah	Elapidae					Query_110322
ETE62137.1	Ophiophagus_hannah	Elapidae				Query_168406	Query_110323
ETE63701.1	Ophiophagus hannah	Elapidae	Query_88609
ETE64476.1	Ophiophagus_hannah	Elapidae				Query_168407
ETE66074.1	Ophiophagus_hannah	Elapidae				Query_168408
ETE66474.1	Ophiophagus_hannah	Elapidae				Query_168409
ETE66785.1	Ophiophagus_hannah	Elapidae				Query_168410
ETE67620.1	Ophiophagus_hannah	Elapidae				Query_168411
ETE70050.1	Ophiophagus hannah	Elapidae		Query_233395
ETE70059.1	Ophiophagus_hannah	Elapidae				Query_168412
ETE70187.1	Ophiophagus_hannah	Elapidae				Query_168413
ETE72276.1	Ophiophagus_hannah	Elapidae				Query_168414
F8J2D4.1	Drysdalia coronoides	Elapidae				Query_168415	Query_110324
F8J2F3.1	Drysdalia coronoides	Elapidae			Query_235235
F8J2F4.1	Drysdalia coronoides	Elapidae			Query_235271
F8J2F5.1	Drysdalia coronoides	Elapidae			Query_235239
F8J2F6.1	Drysdalia coronoides	Elapidae			Query_235321
F8RKW5.1	Drysdalia coronoides	Elapidae	Query_88638
JAS04978.1	Micrurus fulvius	Elapidae		Query_233396
JAS05040.1	Micrurus fulvius	Elapidae	Query_88611
JAS05041.1	Micrurus fulvius	Elapidae	Query_88620
JAS05042.1	Micrurus fulvius	Elapidae	Query_88621
JAS05050.1	Micrurus fulvius	Elapidae			Query_235293
JAS05051.1	Micrurus fulvius	Elapidae			Query_235292
JAS05052.1	Micrurus fulvius	Elapidae			Query_235311
JAS05053.1	Micrurus fulvius	Elapidae			Query_235242
JAS05058.1	Micrurus fulvius	Elapidae			Query_235241
JAS05088.1	Micrurus tener	Elapidae		Query_233397
JAS05145.1	Micrurus tener	Elapidae	Query_88627
JAS05160.1	Micrurus tener	Elapidae			Query_235251
JAS05162.1	Micrurus tener	Elapidae			Query_235265
JAS05163.1	Micrurus tener	Elapidae			Query_235252
P00984.1	Dendroaspis polylepis polylepis	Elapidae			Query_235307
P00985.1	Hemachatus haemachatus	Elapidae			Query_235302
P00986.1	Naja nivea	Elapidae			Query_235248
P01140.2	Naja naja	Elapidae	Query_88633
P20229.1	Naja naja	Elapidae			Query_235326
P25660.1	Bungarus fasciatus	Elapidae			Query_235318
P34128.1	Bungarus multicinctus	Elapidae	Query_88608
P61898.1	Naja atra	Elapidae	Query_88634
P81990.1	Aspidelaps_scutatus	Elapidae				Query_168416
P81991.1	Austrelaps superbus	Elapidae				Query_168417
P81992.1	Austrelaps superbus	Elapidae				Query_168418
P81993.1	Bungarus candidus	Elapidae				Query_168419
P84805.2	Naja kaouthia	Elapidae				Query_168420	Query_110325
P84808.2	Naja kaouthia	Elapidae				Query_168421	Query_110326
P86543.1	Naja naja	Elapidae				Query_168422
pdb|1XTA|A	Naja atra	Elapidae				Query_168423	Query_110327
pdb|1XX5|A	Naja atra	Elapidae				Query_168424	Query_110328
pdb|2DDA|A	Pseudechis australis	Elapidae				Query_168425	Query_110329
pdb|2DDB|A	Pseudechis porphyriacus	Elapidae				Query_168426	Query_110330
pdb|3BYB|A	Pseudonaja textilis textilis	Elapidae			Query_235247
pdb|3D65|I	Pseudonaja textilis textilis	Elapidae			Query_235246
pdb|5M4V|A	Dendroaspis angusticeps	Elapidae			Query_235328
pir||A59218	Naja kaouthia	Elapidae	Query_88635
Q1W7Q6.1	Cryptophis nigrescens	Elapidae	Query_88628
Q3HXX4.1	Tropidechis carinatus	Elapidae	Query_88616
Q3HXX5.1	Tropidechis carinatus	Elapidae	Query_88642
Q3HXX6.1	Tropidechis carinatus	Elapidae	Query_88618
Q3HXX7.1	Tropidechis carinatus	Elapidae	Query_88643
Q3HXX8.1	Tropidechis carinatus	Elapidae	Query_88629
Q3HXX9.1	Hoplocephalus stephensii	Elapidae	Query_88641
Q3HXY0.1	Hoplocephalus stephensii	Elapidae	Query_88622
Q3HXY1.1	Pseudechis australis	Elapidae	Query_88637
Q3HXY2.1	Pseudechis australis	Elapidae	Query_88639
Q3HXY3.1	Pseudechis australis	Elapidae	Query_88636
Q3HXY4.1	Pseudechis porphyriacus	Elapidae	Query_88630
Q3HXY5.1	Notechis scutatus scutatus	Elapidae	Query_88646
Q3HXY6.1	Notechis scutatus scutatus	Elapidae	Query_88647
Q3HXY7.1	Notechis scutatus scutatus	Elapidae	Query_88644
Q3HXY8.1	Pseudonaja textilis	Elapidae	Query_88623
Q3HXY9.1	Pseudonaja textilis	Elapidae	Query_88612
Q3HXZ0.1	Oxyuranus microlepidotus	Elapidae	Query_88614
Q3HXZ1.1	Oxyuranus microlepidotus	Elapidae	Query_88615
Q3I5F4.1	Oxyuranus scutellatus scutellatus	Elapidae	Query_88613
Q3SB03.1	Hoplocephalus stephensii	Elapidae				Query_168427	Query_110331
Q3SB04.1	Notechis scutatus scutatus	Elapidae				Query_168428	Query_110332
Q3SB05.1	Pseudonaja textilis	Elapidae				Query_168429	Query_110333
Q3SB06.1	Oxyuranus microlepidotus	Elapidae				Query_168430	Query_110334
Q3SB07.1	Oxyuranus scutellatus scutellatus	Elapidae				Query_168431	Query_110335
Q5YF89.1	Naja sputatrix	Elapidae	Query_88632
Q5YF90.1	Naja sputatrix	Elapidae	Query_88610
Q6ITB0.1	Tropidechis carinatus	Elapidae			Query_235263
Q6ITB2.1	Notechis scutatus scutatus	Elapidae			Query_235299
Q6ITB3.1	Notechis scutatus scutatus	Elapidae			Query_235275
Q6ITB4.1	Oxyuranus microlepidotus	Elapidae			Query_235255
Q6ITB5.1	Oxyuranus microlepidotus	Elapidae			Query_235253
Q6ITB7.1	Oxyuranus scutellatus scutellatus	Elapidae			Query_235268
Q6ITB8.1	Pseudechis australis	Elapidae			Query_235325
Q6ITB9.1	Pseudechis australis	Elapidae			Query_235262
Q6ITC0.1	Pseudechis australis	Elapidae			Query_235300
Q6ITC1.1	Pseudechis australis	Elapidae			Query_235324
Q7LZS8.1	Dendroaspis angusticeps	Elapidae			Query_235314
Q7T1K6.1	Naja atra	Elapidae				Query_168432	Query_110336
Q7ZT98.1	Ophiophagus hannah	Elapidae				Query_168433	Query_110337
Q7ZZN8.1	Naja atra	Elapidae				Query_168434	Query_110338
Q8AVA3.1	Pseudechis porphyriacus	Elapidae				Query_168435	Query_110339
Q8AVA4.1	Pseudechis australis	Elapidae				Query_168436	Query_110340
Q8AY41.2	Bungarus candidus	Elapidae			Query_235279
Q8AY42.2	Bungarus candidus	Elapidae			Query_235297
Q8AY43.2	Bungarus candidus	Elapidae			Query_235260
Q8JI38.1	Laticauda semifasciata	Elapidae				Query_168437	Query_110341
Q90W99.1	Pseudonaja textilis textilis	Elapidae			Query_235319
Q90WA0.1	Pseudonaja textilis textilis	Elapidae			Query_235249
Q90WA1.1	Pseudonaja textilis textilis	Elapidae			Query_235244
ABY89664.1	Varanus_komodoensis	lizards				Query_218903
ACE95060.1	Heloderma_suspectum_cinctum	lizards				Query_218904	Query_112328
ADB03692.1	Eulamprus tympanum	lizards		Query_221864
ADB03698.1	Saiphos equalis	lizards		Query_221865
ADB03699.1	Niveoscincus metallicus	lizards		Query_221866
ADB03700.1	Pseudemoia entrecasteauxii	lizards		Query_221867
ADB03701.1	Lampropholis guichenoti	lizards		Query_221868
ADJ80246.1	Hemidactylus eniangii	lizards	Query_98129
ADJ80248.1	Hemidactylus eniangii	lizards	Query_98126
ADJ80249.1	Hemidactylus eniangii	lizards	Query_98127
ADJ80254.1	Hemidactylus fasciatus	lizards	Query_98130
ADJ80255.1	Hemidactylus brookii	lizards	Query_98125
ADJ80263.1	Hemidactylus fasciatus	lizards	Query_98124
ADK39226.1	Pseudopus_apodus	lizards				Query_218905
ADK39227.1	Varanus_mertensi	lizards				Query_218906	Query_112329
ADK39228.1	Varanus_panoptes	lizards				Query_218907
ADK39229.1	Varanus_gouldii	lizards				Query_218908	Query_112330
ADK39230.1	Varanus_giganteus	lizards				Query_218909
ADK39231.1	Varanus_gilleni	lizards				Query_218910	Query_112331
ADK39232.1	Varanus_tristis	lizards				Query_218911	Query_112332
ADK39233.1	Varanus_indicus	lizards				Query_218912
ADK39235.1	Varanus_scalaris	lizards				Query_218913	Query_112333
ADK39236.1	Gerrhonotus_infernalis	lizards				Query_218914
ADK39237.1	Celestus_warreni	lizards				Query_218915	Query_112334
AGI97151.1	Heloderma suspectum cinctum	lizards			Query_183535
AGI97151.2	Heloderma suspectum cinctum	lizards			Query_183536
AHZ94912.1	Varzea altamazonica	lizards	Query_98122
AHZ94913.1	Alinea berengerae	lizards	Query_98131
AHZ94923.1	Mabuya sp. NRPS-2014	lizards	Query_98128
AJR32847.1	Calyptotis ruficauda	lizards		Query_221869
AJR32848.1	Anomalopus leuckartii	lizards		Query_221870
AJR32849.1	Hemiergis peronii	lizards		Query_221871
AJR32850.1	Ctenotus taeniolatus	lizards		Query_221872
AJR32852.1	Lerista bougainvillii	lizards		Query_221873
AJT47658.1	Holbrookia maculata	lizards	Query_98037
AJT47659.1	Uta stansburiana	lizards	Query_98032
AJT47660.1	Gambelia wislizenii	lizards	Query_98049
AJT47661.1	Cophosaurus texanus	lizards	Query_98033
AJT47663.1	Urosaurus ornatus	lizards	Query_98035
AJT47665.1	Uma notata	lizards	Query_98050
AJT47666.1	Petrosaurus thalassinus	lizards	Query_98102
AJT47667.1	Liolaemus darwinii	lizards	Query_98051
AKK52223.1	Phrynosoma coronatum	lizards	Query_98034
AKK52224.1	Phrynosoma braconnieri	lizards	Query_98036
AKK52225.1	Sceloporus bicanthalis	lizards	Query_98044
AKK52226.1	Phrynosoma cerroense	lizards	Query_98042
AKK52227.1	Phrynosoma asio	lizards	Query_98104
AKK52228.1	Phrynosoma ditmarsi	lizards	Query_98041
AKK52229.1	Phrynosoma blainvillii	lizards	Query_98038
AKK52230.1	Phrynosoma solare	lizards	Query_98117
AKK52231.1	Phrynosoma orbiculare	lizards	Query_98040
AKK52236.1	Phrynosoma cornutum	lizards	Query_98043
AKK52237.1	Phrynosoma modestum	lizards	Query_98084
AKK52238.1	Phrynosoma hernandesi	lizards	Query_98045
ALS35217.1	Phrynocephalus przewalskii	lizards		Query_221874
ANB30438.1	Sceloporus gadoviae	lizards	Query_98054
ANB30439.1	Sceloporus orcutti	lizards	Query_98072
ANB30440.1	Sceloporus formosus	lizards	Query_98114
ANB30441.1	Sceloporus spinosus	lizards	Query_98081
ANB30442.1	Sceloporus smithi	lizards	Query_98113
ANB30443.1	Sceloporus carinatus	lizards	Query_98046
ANB30444.1	Sceloporus merriami	lizards	Query_98064
ANB30446.1	Sceloporus bimaculosus	lizards	Query_98110
ANB30448.1	Sceloporus poinsettii	lizards	Query_98065
ANB30449.1	Sceloporus undulatus	lizards	Query_98115
ANB30450.1	Sceloporus anahuacus	lizards	Query_98074
ANB30452.1	Sceloporus parvus	lizards	Query_98090
ANB30453.1	Sceloporus virgatus	lizards	Query_98083
ANB30454.1	Sceloporus squamosus	lizards	Query_98039
ANB30455.1	Sceloporus megalepidurus pictus	lizards	Query_98089
ANB30458.1	Sceloporus slevini	lizards	Query_98112
ANB30459.1	Sceloporus lineatulus	lizards	Query_98063
ANB30460.1	Sceloporus nelsoni	lizards	Query_98088
ANB30461.1	Sceloporus asper	lizards	Query_98109
ANB30463.1	Sceloporus uniformis	lizards	Query_98103
ANB30464.1	Sceloporus adleri	lizards	Query_98098
ANB30465.1	Sceloporus chaneyi	lizards	Query_98076
ANB30466.1	Sceloporus aeneus	lizards	Query_98099
ANB30467.1	Sceloporus chrysostictus	lizards	Query_98069
ANB30469.1	Sceloporus arenicolus	lizards	Query_98055
ANB30470.1	Sceloporus scalaris unicanthalis	lizards	Query_98120
ANB30471.1	Sceloporus licki	lizards	Query_98071
ANB30473.1	Sceloporus angustus	lizards	Query_98075
ANB30475.1	Sceloporus aurantius	lizards	Query_98080
ANB30476.1	Sceloporus samcolemani	lizards	Query_98066
ANB30477.1	Sceloporus subniger	lizards	Query_98087
ANB30480.1	Sceloporus cyanogenys	lizards	Query_98119
ANB30482.1	Sceloporus pyrocephalus	lizards	Query_98067
ANB30483.1	Sceloporus druckercolini	lizards	Query_98118
ANB30484.1	Sceloporus aureolus	lizards	Query_98092
ANB30485.1	Sceloporus magister magister	lizards	Query_98060
ANB30488.1	Sceloporus smaragdinus	lizards	Query_98106
ANB30489.1	Sceloporus exsul	lizards	Query_98123
ANB30490.1	Sceloporus cowlesi	lizards	Query_98108
ANB30491.1	Sceloporus siniferus	lizards	Query_98047
ANB30492.1	Sceloporus minor	lizards	Query_98095
ANB30493.1	Sceloporus utiformis	lizards	Query_98048
ANB30494.1	Sceloporus jalapae	lizards	Query_98062
ANB30495.1	Sceloporus shannonorum	lizards	Query_98116
ANB30496.1	Sceloporus ochoterenae	lizards	Query_98094
ANB30497.1	Sceloporus grammicus	lizards	Query_98100
ANB30498.1	Sceloporus bulleri	lizards	Query_98121
ANB30499.1	Sceloporus melanorhinus	lizards	Query_98079
ANB30500.1	Sceloporus macdougalli	lizards	Query_98107
ANB30501.1	Sceloporus dugesii	lizards	Query_98085
ANB30505.1	Sceloporus couchii	lizards	Query_98058
ANB30506.1	Sceloporus mucronatus	lizards	Query_98070
ANB30507.1	Sceloporus jarrovii lineolateralis	lizards	Query_98078
ANB30508.1	Sceloporus aureolus	lizards	Query_98096
ANB30512.1	Sceloporus scalaris brownorum	lizards	Query_98097
ANB30514.1	Sceloporus uniformis	lizards	Query_98068
ANB30515.1	Sceloporus graciosus	lizards	Query_98056
ANB30517.1	Sceloporus variabilis	lizards	Query_98077
ANB30518.1	Callisaurus draconoides	lizards	Query_98073
ANB30519.1	Sceloporus pyrocephalus	lizards	Query_98105
ANB30521.1	Sceloporus subniger	lizards	Query_98111
ANB30526.1	Sceloporus internasalis	lizards	Query_98059
ANB30527.1	Sceloporus cryptus	lizards	Query_98091
ANB30532.1	Sceloporus zosteromus	lizards	Query_98061
ANB30534.1	Sceloporus maculosus	lizards	Query_98057
ANB30536.1	Sceloporus heterolepis	lizards	Query_98082
ANB30537.1	Sceloporus horridus	lizards	Query_98052
ANB30539.1	Sceloporus scalaris	lizards	Query_98086
Q2XXP1.1	Varanus varius	lizards				Query_218916	Query_112335
Q2XXP2.1	Varanus varius	lizards				Query_218917	Query_112336
Q2XXP3.1	Varanus varius	lizards				Query_218918
Q2XXQ7.1	Varanus acanthurus	lizards				Query_218919
Q2XXQ8.1	Varanus acanthurus	lizards				Query_218920
Q2XXQ9.1	Varanus acanthurus	lizards				Query_218921
Q2XXR0.1	Varanus acanthurus	lizards				Query_218922	Query_112337
Q2XXR1.1	Varanus acanthurus	lizards				Query_218923
Q2XXR2.1	Varanus acanthurus	lizards				Query_218924
Q2XXR3.1	Varanus acanthurus	lizards				Query_218925
Q2XXR4.1	Varanus acanthurus	lizards				Query_218926
Q91055.1	Heloderma horridum horridum	lizards				Query_218927	Query_112338
XP_003215243.1	Anolis_carolinensis	lizards				Query_218928	Query_112339
XP_003215259.1	Anolis_carolinensis	lizards				Query_218929	Query_112340
XP_003215375.1	Anolis_carolinensis	lizards				Query_218930
XP_003217358.1	Anolis carolinensis	lizards			Query_183543
XP_003219632.1	Anolis_carolinensis	lizards				Query_218931
XP_003220556.2	Anolis carolinensis	lizards	Query_98053
XP_003220682.1	Anolis_carolinensis	lizards				Query_218932
XP_003221201.1	Anolis_carolinensis	lizards				Query_218933
XP_003221218.1	Anolis_carolinensis	lizards				Query_218934
XP_003222287.1	Anolis_carolinensis	lizards				Query_218935
XP_003228344.1	Anolis_carolinensis	lizards				Query_218936
XP_003230363.2	Anolis carolinensis	lizards			Query_183531
XP_008106810.1	Anolis_carolinensis	lizards				Query_218937
XP_008107961.1	Anolis_carolinensis	lizards				Query_218938
XP_008108041.1	Anolis_carolinensis	lizards				Query_218939
XP_008109171.1	Anolis_carolinensis	lizards				Query_218940
XP_008109172.1	Anolis_carolinensis	lizards				Query_218941
XP_008109173.1	Anolis_carolinensis	lizards				Query_218942
XP_008109174.1	Anolis_carolinensis	lizards				Query_218943
XP_008112082.1	Anolis carolinensis	lizards			Query_183537
XP_008112082.2	Anolis carolinensis	lizards			Query_183538
XP_008112622.1	Anolis_carolinensis	lizards				Query_218944	Query_112341
XP_008115058.1	Anolis carolinensis	lizards			Query_183532
XP_008115058.2	Anolis carolinensis	lizards			Query_183533
XP_008115088.1	Anolis_carolinensis	lizards				Query_218945	Query_112342
XP_008117944.1	Anolis carolinensis	lizards			Query_183522
XP_008117944.2	Anolis carolinensis	lizards			Query_183523
XP_008121978.1	Anolis carolinensis	lizards			Query_183530
XP_008123404.1	Anolis carolinensis	lizards			Query_183534
XP_015262138.1	Gekko_japonicus	lizards				Query_218946
XP_015262156.1	Gekko_japonicus	lizards				Query_218947
XP_015263618.1	Gekko_japonicus	lizards				Query_218948
XP_015263798.1	Gekko japonicus	lizards	Query_98093
XP_015265908.1	Gekko_japonicus	lizards				Query_218949
XP_015266014.1	Gekko japonicus	lizards			Query_183544
XP_015266014.2	Gekko japonicus	lizards			Query_183545
XP_015266255.1	Gekko japonicus	lizards			Query_183547
XP_015266725.1	Gekko_japonicus	lizards				Query_218950
XP_015266767.1	Gekko_japonicus	lizards				Query_218951
XP_015266877.1	Gekko_japonicus	lizards				Query_218952
XP_015267015.1	Gekko_japonicus	lizards				Query_218953
XP_015270820.1	Gekko japonicus	lizards			Query_183526
XP_015270820.2	Gekko japonicus	lizards			Query_183527
XP_015270821.1	Gekko japonicus	lizards			Query_183524
XP_015270821.2	Gekko japonicus	lizards			Query_183525
XP_015271860.1	Gekko_japonicus	lizards				Query_218954
XP_015274927.1	Gekko_japonicus	lizards				Query_218955
XP_015275338.1	Gekko japonicus	lizards			Query_183519
XP_015278044.1	Gekko_japonicus	lizards				Query_218956	Query_112343
XP_015278045.1	Gekko_japonicus	lizards				Query_218957	Query_112344
XP_015278048.1	Gekko_japonicus	lizards				Query_218958	Query_112345
XP_015279712.1	Gekko_japonicus	lizards				Query_218959
XP_015282964.1	Gekko japonicus	lizards			Query_183516
XP_015284721.1	Gekko japonicus	lizards		Query_221875
XP_016850701.1	Anolis_carolinensis	lizards				Query_218960
XP_016851841.1	Anolis_carolinensis	lizards				Query_218961	Query_112346
XP_016853370.1	Anolis_carolinensis	lizards				Query_218962
XP_016853595.1	Anolis carolinensis	lizards			Query_183518
XP_016854907.1	Anolis carolinensis	lizards		Query_221876
XP_020636321.1	Pogona vitticeps	lizards	Query_98101
XP_020640770.1	Pogona vitticeps	lizards		Query_221877
XP_020642763.1	Pogona vitticeps	lizards			Query_183541
XP_020642763.2	Pogona vitticeps	lizards			Query_183542
XP_020643163.1	Pogona_vitticeps	lizards				Query_218963
XP_020643220.1	Pogona_vitticeps	lizards				Query_218964
XP_020644928.1	Pogona_vitticeps	lizards				Query_218965
XP_020646261.1	Pogona_vitticeps	lizards				Query_218966
XP_020646262.1	Pogona_vitticeps	lizards				Query_218967
XP_020646263.1	Pogona_vitticeps	lizards				Query_218968	Query_112347
XP_020646265.1	Pogona_vitticeps	lizards				Query_218969
XP_020646266.1	Pogona_vitticeps	lizards				Query_218970
XP_020646268.1	Pogona_vitticeps	lizards				Query_218971	Query_112348
XP_020646274.1	Pogona_vitticeps	lizards				Query_218972	Query_112349
XP_020646282.1	Pogona_vitticeps	lizards				Query_218973	Query_112350
XP_020646283.1	Pogona_vitticeps	lizards				Query_218974	Query_112351
XP_020646284.1	Pogona_vitticeps	lizards				Query_218975	Query_112352
XP_020646293.1	Pogona_vitticeps	lizards				Query_218976
XP_020646297.1	Pogona_vitticeps	lizards				Query_218977	Query_112353
XP_020646298.1	Pogona_vitticeps	lizards				Query_218978
XP_020651059.1	Pogona_vitticeps	lizards				Query_218979
XP_020651068.1	Pogona_vitticeps	lizards				Query_218980
XP_020651429.1	Pogona vitticeps	lizards			Query_183520
XP_020651429.2	Pogona vitticeps	lizards			Query_183521
XP_020657603.1	Pogona_vitticeps	lizards				Query_218981
XP_020660050.1	Pogona_vitticeps	lizards				Query_218982
XP_020660078.1	Pogona_vitticeps	lizards				Query_218983
XP_020660101.1	Pogona_vitticeps	lizards				Query_218984
XP_020660113.1	Pogona_vitticeps	lizards				Query_218985
XP_020662427.1	Pogona_vitticeps	lizards				Query_218986
XP_020662429.1	Pogona_vitticeps	lizards				Query_218987
XP_020662430.1	Pogona_vitticeps	lizards				Query_218988
XP_020662688.1	Pogona vitticeps	lizards			Query_183528
XP_020662688.2	Pogona vitticeps	lizards			Query_183529
XP_020662707.1	Pogona vitticeps	lizards			Query_183517
XP_020663841.1	Pogona vitticeps	lizards			Query_183539
XP_020663841.2	Pogona vitticeps	lizards			Query_183540
XP_020671067.1	Pogona vitticeps	lizards			Query_183546
1RC9_A	Trimeresurus stejnegeri	New World Vipers
1WVR_A	Protobothrops flavoviridis	New World Vipers
A5X2X1.1	Sistrurus catenatus edwardsi	New World Vipers	Query_116533		Query_189698
AAB48565.1	Protobothrops mucrosquamatus	New World Vipers	Query_116534			Query_234046	Query_183133
ABG26990.1	Sistrurus catenatus edwardsi	New World Vipers	Query_116536
ACC85805.1	Azemiops feae	New World Vipers	Query_116537
ACC85807.1	Bothrops asper	New World Vipers
ACC85821.1	Lachesis stenophrys	New World Vipers
ACE73558.1	Azemiops feae	New World Vipers				Query_234047	Query_183134
ACE73559.1	Bothriechis schlegelii	New World Vipers				Query_234048	Query_183135
ACE73560.1	Crotalus horridus	New World Vipers				Query_234049	Query_183136
ACE73561.1	Crotalus horridus	New World Vipers				Query_234050	Query_183137
ACE73562.1	Crotalus horridus	New World Vipers				Query_234051	Query_183138
ACE73563.1	Crotalus horridus	New World Vipers				Query_234052	Query_183139
ACE73564.1	Crotalus horridus	New World Vipers				Query_234053	Query_183140
ACE73565.1	Calloselasma rhodostoma	New World Vipers				Query_234054	Query_183141
ACE73566.1	Crotalus viridis	New World Vipers				Query_234055	Query_183142
ACE73569.1	Trimeresurus gracilis	New World Vipers				Query_234056	Query_183143
ACE73570.1	Trimeresurus gracilis	New World Vipers				Query_234057	Query_183144
ACE73571.1	Cerrophidion godmani	New World Vipers				Query_234058	Query_183145
ACE73572.1	Trimeresurus stejnegeri	New World Vipers				Query_234059	Query_183146
ACE73573.1	Trimeresurus stejnegeri	New World Vipers				Query_234060	Query_183147
ACE73574.1	Trimeresurus stejnegeri	New World Vipers				Query_234061	Query_183148
ACE73575.1	Deinagkistrodon acutus	New World Vipers				Query_234062	Query_183149
ACE73576.1	Deinagkistrodon acutus	New World Vipers				Query_234063	Query_183150
ACV60546.1	Sistrurus catenatus edwardsi	New World Vipers			Query_189699
ACV84001.1	Sistrurus catenatus edwardsi	New World Vipers			Query_189700
AEU60000.1	Crotalus oreganus helleri	New World Vipers				Query_234064	Query_183151
AEU60001.1	Crotalus oreganus helleri	New World Vipers	Query_116522			Query_234065	Query_183152
ALB06109.1	Gloydius intermedius	New World Vipers				Query_234066	Query_183153
ALB06112.1	Gloydius intermedius	New World Vipers	Query_116535
B0VXV6.1	Sistrurus catenatus edwardsi	New World Vipers
B8QCG6.1	Agkistrodon contortrix contortrix	New World Vipers
BAD38845.1	Protobothrops flavoviridis	New World Vipers	Query_116518	Query_182220
BAD38846.1	Protobothrops flavoviridis	New World Vipers		Query_182221
BAG16511.1	Protobothrops flavoviridis	New World Vipers	Query_116529
BAN81986.1	Protobothrops flavoviridis	New World Vipers				Query_234068	Query_183155
BAN82142.1	Ovophis okinavensis	New World Vipers
BAN82147.1	Ovophis okinavensis	New World Vipers				Query_234069	Query_183156
BAN89363.1	Protobothrops flavoviridis	New World Vipers			Query_189721
BAN89382.1	Protobothrops flavoviridis	New World Vipers		Query_182222
BAN89432.1	Ovophis okinavensis	New World Vipers			Query_189724
BAN89433.1	Ovophis okinavensis	New World Vipers			Query_189723
BAN89442.1	Ovophis okinavensis	New World Vipers		Query_182223
BAN89444.1	Ovophis okinavensis	New World Vipers		Query_182224
BAN89445.1	Ovophis okinavensis	New World Vipers	Query_116531	Query_182225
BAP39923.1	Protobothrops elegans	New World Vipers				Query_234070	Query_183157
BAP39926.1	Protobothrops elegans	New World Vipers
BAP39940.1	Protobothrops elegans	New World Vipers	Query_116520	Query_182226
BAP39957.1	Protobothrops flavoviridis	New World Vipers				Query_234071	Query_183158
BAP39981.1	Protobothrops flavoviridis	New World Vipers
C0K3N4.1	Agkistrodon piscivorus piscivorus	New World Vipers		Query_182227
C0K3N5.1	Vipera ammodytes ammodytes	New World Vipers	Query_116525	Query_4534
F8S0Y4.1	Crotalus adamanteus	New World Vipers				Query_234072	Query_183159
JAS04521.1	Agkistrodon piscivorus	New World Vipers
JAS04523.1	Agkistrodon piscivorus	New World Vipers			Query_189713
JAS04550.1	Agkistrodon piscivorus	New World Vipers	Query_116526			Query_234073	Query_183160
JAS04664.1	Crotalus adamanteus	New World Vipers		Query_182228
JAS04703.1	Crotalus adamanteus	New World Vipers
JAS04707.1	Crotalus adamanteus	New World Vipers	Query_116528		Query_189714
JAS04740.1	Crotalus horridus	New World Vipers		Query_182229
JAS04781.1	Crotalus horridus	New World Vipers
JAS04785.1	Crotalus horridus	New World Vipers			Query_189710
JAS04799.1	Crotalus horridus	New World Vipers				Query_234074	Query_183161
JAS04805.1	Crotalus horridus	New World Vipers	Query_116532	Query_182230
JAS04894.1	Crotalus horridus	New World Vipers				Query_234075	Query_183162
JAS05315.1	Sistrurus catenatus tergeminus	New World Vipers
JAS05320.1	Sistrurus catenatus tergeminus	New World Vipers			Query_189709
JAS05358.1	Sistrurus catenatus tergeminus	New World Vipers				Query_234076	Query_183163
JAS05359.1	Sistrurus catenatus tergeminus	New World Vipers				Query_234077	Query_183164
JAS05360.1	Sistrurus catenatus tergeminus	New World Vipers				Query_234078	Query_183165
JAS05361.1	Sistrurus catenatus tergeminus	New World Vipers	Query_116519			Query_234079	Query_183166
JAS05367.1	Sistrurus miliarius barbouri	New World Vipers		Query_182231
JAS05454.1	Sistrurus miliarius barbouri	New World Vipers
JAS05457.1	Sistrurus miliarius barbouri	New World Vipers			Query_189711
JAS05484.1	Sistrurus miliarius barbouri	New World Vipers				Query_234080	Query_183167
JAS05485.1	Sistrurus miliarius barbouri	New World Vipers				Query_234081	Query_183168
JAV01813.1	Bothrops atrox	New World Vipers	Query_116524	Query_182232
JAV01815.1	Bothrops atrox	New World Vipers		Query_182233
JAV01886.1	Bothrops atrox	New World Vipers
JAV01889.1	Bothrops atrox	New World Vipers			Query_189707
JAV01890.1	Bothrops atrox	New World Vipers			Query_189718
JAV01891.1	Bothrops atrox	New World Vipers			Query_189717
JAV01948.1	Bothrops atrox	New World Vipers				Query_234082	Query_183169
JAV48428.1	Crotalus adamanteus	New World Vipers			Query_189706
JAV48607.1	Agkistrodon_contortrix_contortrix	New World Vipers				Query_234083
JAV49873.1	Agkistrodon_contortrix_contortrix	New World Vipers				Query_234084
JAV50189.1	Agkistrodon contortrix contortrix	New World Vipers			Query_189712
JAV51273.1	Agkistrodon contortrix contortrix	New World Vipers			Query_189725
P0CB15.1	Protobothrops flavoviridis	New World Vipers				Query_234085	Query_183170
P60623.1	Trimeresurus stejnegeri	New World Vipers				Query_234086	Query_183171
P67860.1	Protobothrops flavoviridis	New World Vipers		Query_182234
P79845.2	Protobothrops mucrosquamatus	New World Vipers				Query_234087	Query_183172
P81995.1	Trimeresurus purpureomaculatus	New World Vipers	Query_116523			Query_234088
P83906.1	Bitis gabonica	New World Vipers		Query_4535
pdb|1RC9|A	Trimeresurus stejnegeri	New World Vipers				Query_234089	Query_183173
pdb|1WVR|A	Protobothrops flavoviridis	New World Vipers				Query_234090	Query_183174
Q2XXL6.1	Azemiops feae	New World Vipers
Q7ZT99.1	Crotalus atrox	New World Vipers				Query_234091	Query_183175
Q7ZTA0.1	Agkistrodon piscivorus piscivorus	New World Vipers				Query_234092	Query_183176
Q7ZZN9.1	Protobothrops jerdonii	New World Vipers				Query_234093	Query_183177
Q8JI39.1	Protobothrops flavoviridis	New World Vipers	Query_116521			Query_234094	Query_183178
Q8JI40.1	Gloydius blomhoffii	New World Vipers	Query_116527			Query_234095	Query_183179
Q90W38.1	Bothrops jararacussu	New World Vipers
Q9DEZ9.1	Crotalus durissus terrificus	New World Vipers	Query_116530
XP_015666034.1	Protobothrops mucrosquamatus	New World Vipers				Query_234096
XP_015667078.1	Protobothrops mucrosquamatus	New World Vipers			Query_189737
XP_015667095.1	Protobothrops mucrosquamatus	New World Vipers			Query_189734
XP_015667549.1	Protobothrops mucrosquamatus	New World Vipers
XP_015668082.1	Protobothrops mucrosquamatus	New World Vipers				Query_234097
XP_015668707.1	Protobothrops mucrosquamatus	New World Vipers				Query_234098
XP_015668712.1	Protobothrops mucrosquamatus	New World Vipers				Query_234099
XP_015669377.1	Protobothrops mucrosquamatus	New World Vipers			Query_189715
XP_015669378.1	Protobothrops mucrosquamatus	New World Vipers			Query_189716
XP_015669851.1	Protobothrops mucrosquamatus	New World Vipers			Query_189738
XP_015671194.1	Protobothrops mucrosquamatus	New World Vipers			Query_189736
XP_015671397.1	Protobothrops mucrosquamatus	New World Vipers			Query_189740
XP_015673435.1	Protobothrops mucrosquamatus	New World Vipers		Query_182235
XP_015673445.1	Protobothrops mucrosquamatus	New World Vipers		Query_182236
XP_015673452.1	Protobothrops mucrosquamatus	New World Vipers		Query_182237
XP_015674436.1	Protobothrops mucrosquamatus	New World Vipers			Query_189739
XP_015674677.1	Protobothrops mucrosquamatus	New World Vipers			Query_189732
XP_015675160.1	Protobothrops mucrosquamatus	New World Vipers				Query_234100
XP_015675161.1	Protobothrops mucrosquamatus	New World Vipers				Query_234101
XP_015675164.1	Protobothrops mucrosquamatus	New World Vipers				Query_234102
XP_015675446.1	Protobothrops mucrosquamatus	New World Vipers
XP_015676167.1	Protobothrops mucrosquamatus	New World Vipers					Query_183180
XP_015676182.1	Protobothrops mucrosquamatus	New World Vipers				Query_234103
XP_015676183.1	Protobothrops_mucrosquamatus	New World Vipers				Query_234104
XP_015676224.1	Protobothrops mucrosquamatus	New World Vipers			Query_189730
XP_015676228.1	Protobothrops mucrosquamatus	New World Vipers			Query_189727
XP_015676229.1	Protobothrops mucrosquamatus	New World Vipers			Query_189726
XP_015676849.1	Protobothrops mucrosquamatus	New World Vipers			Query_189728
XP_015676850.1	Protobothrops mucrosquamatus	New World Vipers			Query_189729
XP_015678372.1	Protobothrops mucrosquamatus	New World Vipers				Query_234105	Query_183181
XP_015678374.1	Protobothrops mucrosquamatus	New World Vipers				Query_234106	Query_183182
XP_015678889.1	Protobothrops mucrosquamatus	New World Vipers					Query_183183
XP_015679767.1	Protobothrops_mucrosquamatus	New World Vipers				Query_234107
XP_015679768.1	Protobothrops_mucrosquamatus	New World Vipers				Query_234108
XP_015680397.1	Protobothrops_mucrosquamatus	New World Vipers				Query_234109
XP_015681379.1	Protobothrops_mucrosquamatus	New World Vipers				Query_234110
XP_015681880.1	Protobothrops mucrosquamatus	New World Vipers			Query_189719
XP_015681881.1	Protobothrops mucrosquamatus	New World Vipers			Query_189720
XP_015682427.1	Protobothrops mucrosquamatus	New World Vipers			Query_189697
XP_015682429.1	Protobothrops mucrosquamatus	New World Vipers			Query_189696
XP_015682430.1	Protobothrops mucrosquamatus	New World Vipers			Query_189703
XP_015683261.1	Protobothrops mucrosquamatus	New World Vipers
XP_015683734.1	Protobothrops mucrosquamatus	New World Vipers			Query_189731
XP_015684301.1	Protobothrops mucrosquamatus	New World Vipers			Query_189733
XP_015684549.1	Protobothrops mucrosquamatus	New World Vipers			Query_189722
XP_015685125.1	Protobothrops mucrosquamatus	New World Vipers			Query_189701
XP_015685163.1	Protobothrops mucrosquamatus	New World Vipers				Query_234111
XP_015685170.1	Protobothrops mucrosquamatus	New World Vipers			Query_189704
XP_015686492.1	Protobothrops mucrosquamatus	New World Vipers			Query_189705
XP_015686853.1	Protobothrops mucrosquamatus	New World Vipers			Query_189702
XP_015687114.1	Protobothrops mucrosquamatus	New World Vipers			Query_189735
0909196A	Vipera ammodytes	Old World Vipers
A7X4T8.1	Causus rhombeatus	Old World Vipers				Query_237214	Query_100438
A8Y7N4.1	Daboia siamensis	Old World Vipers			Query_31876
A8Y7N5.1	Daboia siamensis	Old World Vipers			Query_31875
A8Y7N6.1	Daboia siamensis	Old World Vipers			Query_31854
A8Y7N7.1	Daboia siamensis	Old World Vipers			Query_31856
A8Y7N8.1	Daboia siamensis	Old World Vipers			Query_31878
A8Y7N9.1	Daboia siamensis	Old World Vipers			Query_31846
A8Y7P1.1	Daboia siamensis	Old World Vipers			Query_31865
A8Y7P2.1	Daboia siamensis	Old World Vipers			Query_31879
A8Y7P3.1	Daboia siamensis	Old World Vipers			Query_31868
A8Y7P4.1	Daboia siamensis	Old World Vipers			Query_31874
A8Y7P5.1	Daboia siamensis	Old World Vipers	Query_127330		Query_31866
A8Y7P6.1	Daboia siamensis	Old World Vipers	Query_127329		Query_31870
AAR24530.1	Bitis gabonica	Old World Vipers	Query_127328
ACC85810.1	Causus defilippii	Old World Vipers
ACC85813.1	Daboia russelii	Old World Vipers
ACE73557.1	Atheris nitschei	Old World Vipers				Query_237215	Query_100439
ACE73567.1	Daboia russelii	Old World Vipers	Query_127324			Query_237216	Query_100440
ACE73568.1	Daboia russelii	Old World Vipers	Query_127323			Query_237217	Query_100441
AEH59579.1	Daboia russelii	Old World Vipers	Query_127326
AEH59580.1	Daboia russelii	Old World Vipers
AEH59582.1	Vipera ursinii	Old World Vipers
AEI52542.1	Vipera renardi	Old World Vipers			Query_31841
AEI52543.1	Vipera renardi	Old World Vipers			Query_31864
AFA90080.1	Daboia siamensis	Old World Vipers			Query_31843
AFD04724.1	Daboia russelii	Old World Vipers			Query_31855
AFE83617.1	Daboia russelii	Old World Vipers			Query_31877
AMB36337.1	Vipera ammodytes ammodytes	Old World Vipers				Query_237218	Query_100442
AMH40733.1	Vipera ammodytes ammodytes	Old World Vipers			Query_31857
AMH40734.1	Vipera ammodytes ammodytes	Old World Vipers			Query_31844
AMH40735.1	Vipera ammodytes ammodytes	Old World Vipers			Query_31848
AMH40736.1	Vipera ammodytes ammodytes	Old World Vipers			Query_31867
AMH40737.1	Vipera ammodytes ammodytes	Old World Vipers			Query_31847
AMH40739.1	Vipera ammodytes ammodytes	Old World Vipers			Query_31849
B7FDI0.1	Vipera nikolskii	Old World Vipers				Query_237219	Query_100443
B7FDI1.1	Vipera berus	Old World Vipers				Query_237220	Query_100444
E5AJX3.1	Vipera nikolskii	Old World Vipers			Query_31851
H6VC06.1	Daboia russellii russellii	Old World Vipers			Query_31869
I2G9B4.1	Macrovipera lebetina transmediterranea	Old World Vipers			Query_31872
P00990.1	Daboia siamensis	Old World Vipers			Query_31873
P00991.2	Vipera ammodytes ammodytes	Old World Vipers			Query_31859
P00992.2	Vipera ammodytes ammodytes	Old World Vipers	Query_127331		Query_31861
P0DKL8.1	Vipera renardi	Old World Vipers			Query_31842
P0DMD1.1	Echis ocellatus	Old World Vipers
P0DMT4.1	Echis coloratus	Old World Vipers	Query_127327			Query_237221	Query_100445
P24541.1	Eristicophis macmahoni	Old World Vipers	Query_127325		Query_31853
P25428.2	Macrovipera lebetina	Old World Vipers
P30894.1	Daboia russellii russellii	Old World Vipers
prf||0909196A	Vipera ammodytes	Old World Vipers			Query_31850
Q2ES46.1	Daboia russellii russellii	Old World Vipers			Query_31845
Q2ES47.1	Eristicophis macmahoni	Old World Vipers			Query_31852
Q2ES48.1	Daboia russellii russellii	Old World Vipers			Query_31858
Q2ES49.1	Daboia russellii russellii	Old World Vipers			Query_31880
Q2ES50.1	Daboia russellii russellii	Old World Vipers			Query_31871
Q6T269.1	Bitis gabonica	Old World Vipers			Query_31863
Q6T6S5.1	Bitis gabonica	Old World Vipers			Query_31860
Q6T6T5.1	Bitis gabonica	Old World Vipers			Query_31862
ACC85803.1	Aspidites melanocephalus	Pythonidae	Query_223258
ACC85835.1	Python molurus	Pythonidae	Query_223259
XP_007420116.1	Python bivittatus	Pythonidae			Query_69795
XP_007420902.1	Python_bivittatus	Pythonidae				Query_227927
XP_007423048.1	Python_bivittatus	Pythonidae				Query_227928
XP_007423721.1	Python_bivittatus	Pythonidae				Query_227929
XP_007424508.1	Python_bivittatus	Pythonidae				Query_227930
XP_007424657.1	Python bivittatus	Pythonidae			Query_69794
XP_007428099.1	Python bivittatus	Pythonidae		Query_71155
XP_007428986.1	Python bivittatus	Pythonidae	Query_223257
XP_007430092.1	Python_bivittatus	Pythonidae				Query_227931
XP_007432682.1	Python_bivittatus	Pythonidae				Query_227932
XP_007433126.1	Python_bivittatus	Pythonidae				Query_227933
XP_007433853.1	Python bivittatus	Pythonidae			Query_69792
XP_007436999.1	Python_bivittatus	Pythonidae				Query_227934	Query_199837
XP_007437592.1	Python_bivittatus	Pythonidae				Query_227935
XP_007439730.1	Python_bivittatus	Pythonidae				Query_227936
XP_007441105.1	Python bivittatus	Pythonidae					Query_199838
XP_007442486.1	Python_bivittatus	Pythonidae				Query_227937
XP_007442545.1	Python bivittatus	Pythonidae			Query_69796
XP_007443071.1	Python bivittatus	Pythonidae			Query_69791
XP_007443531.1	Python bivittatus	Pythonidae			Query_69793
XP_007444025.1	Python bivittatus	Pythonidae					Query_199839
XP_007445096.2	Python bivittatus	Pythonidae			Query_69789
XP_007445182.1	Python_bivittatus	Pythonidae				Query_227938
XP_007445407.2	Python bivittatus	Pythonidae			Query_69790
XP_015746646.1	Python_bivittatus	Pythonidae				Query_227939
ACY72431.1	Batagur trivittata	Testudines	Query_233265
ACY72432.1	Carettochelys insculpta	Testudines	Query_233257
ACY72433.1	Chelonia mydas	Testudines	Query_233314
ACY72434.1	Chrysemys picta	Testudines	Query_233264
ACY72435.1	Chelydra serpentina	Testudines	Query_233284
ACY72438.1	Actinemys marmorata	Testudines	Query_233261
ACY72439.1	Kinosternon flavescens	Testudines	Query_233280
ACY72441.1	Mauremys reevesii	Testudines	Query_233292
ACY72442.1	Macrochelys temminckii	Testudines	Query_233326
ACY72443.1	Platysternon megacephalum	Testudines	Query_233255
ACY72446.1	Pelomedusa subrufa	Testudines	Query_233329
ACY72448.1	Sternotherus odoratus	Testudines	Query_233346
ACY72449.1	Testudo graeca	Testudines	Query_233332
AFG17220.1	Cyclemys fusca	Testudines	Query_233310
AFG17221.1	Heosemys annandalii	Testudines	Query_233277
AFG17222.1	Heosemys annandalii	Testudines	Query_233259
AFG17223.1	Heosemys depressa	Testudines	Query_233291
AFG17225.1	Heosemys grandis	Testudines	Query_233269
AFJ15303.1	Cuora amboinensis	Testudines	Query_233276
AFJ15304.1	Cuora amboinensis	Testudines	Query_233267
AFJ15305.1	Cuora aurocapitata	Testudines	Query_233273
AFJ15311.1	Cuora galbinifrons	Testudines	Query_233296
AFJ15315.1	Cuora mouhotii	Testudines	Query_233274
AFJ15318.1	Cuora pani	Testudines	Query_233302
AFJ15323.1	Cuora trifasciata	Testudines	Query_233324
AFJ15324.1	Cuora trifasciata	Testudines	Query_233298
AFJ15339.1	Cuora yunnanensis	Testudines	Query_233300
AHE80637.1	Carettochelys insculpta	Testudines	Query_233256
AHG95783.1	Platysternon megacephalum	Testudines	Query_233254
AHH55233.1	Chelodina oblonga	Testudines	Query_233308
AHH55234.1	Chelus fimbriatus	Testudines	Query_233271
AHH55235.1	Elseya branderhorsti	Testudines	Query_233337
AHH55236.1	Emydura subglobosa	Testudines	Query_233331
AHH55237.1	Pelomedusa subrufa	Testudines	Query_233333
AHH55238.1	Pelusios castaneus	Testudines	Query_233338
AHH55239.1	Platemys platycephala	Testudines	Query_233318
AIG13503.1	Actinemys marmorata pallida	Testudines	Query_233268
AIG13504.1	Actinemys marmorata pallida	Testudines	Query_233290
AIG13505.1	Actinemys marmorata	Testudines	Query_233275
AIG13506.1	Actinemys marmorata pallida	Testudines	Query_233283
AIG13508.1	Actinemys marmorata	Testudines	Query_233266
AIG13563.1	Dermatemys mawii	Testudines	Query_233320
AIG13565.1	Claudius angustatus	Testudines	Query_233345
AIG13567.1	Kinosternon acutum	Testudines	Query_233340
AIG13569.1	Kinosternon arizonense	Testudines	Query_233305
AIG13570.1	Kinosternon baurii	Testudines	Query_233289
AIG13575.1	Kinosternon dunni	Testudines	Query_233349
AIG13577.1	Kinosternon durangoense	Testudines	Query_233313
AIG13579.1	Kinosternon flavescens	Testudines	Query_233334
AIG13583.1	Kinosternon hirtipes	Testudines	Query_233342
AIG13590.1	Kinosternon oaxacae	Testudines	Query_233348
AIG13592.1	Kinosternon scorpioides	Testudines	Query_233351
AIG13593.1	Kinosternon scorpioides cruentatum	Testudines	Query_233335
AIG13594.1	Kinosternon scorpioides cruentatum	Testudines	Query_233347
AIG13597.1	Kinosternon subrubrum	Testudines	Query_233301
AIG13598.1	Kinosternon subrubrum	Testudines	Query_233288
AIG13599.1	Sternotherus carinatus	Testudines	Query_233350
AIG13600.1	Sternotherus carinatus	Testudines	Query_233341
AIG13601.1	Sternotherus depressus	Testudines	Query_233343
AIG13602.1	Sternotherus depressus	Testudines	Query_233344
AIG13603.1	Sternotherus minor minor	Testudines	Query_233304
AIG13606.1	Staurotypus salvinii	Testudines	Query_233352
AIG13609.1	Staurotypus triporcatus	Testudines	Query_233339
AKD58918.1	Cuora trifasciata	Testudines	Query_233315
AKD58925.1	Cuora mouhotii	Testudines	Query_233287
AKD58926.1	Cuora amboinensis	Testudines	Query_233294
ANN11969.1	Chelodina colliei	Testudines	Query_233317
ANN11970.1	Chelodina oblonga	Testudines	Query_233295
ANN11972.1	Elseya branderhorsti	Testudines	Query_233303
ANN11973.1	Elseya branderhorsti	Testudines	Query_233262
ANN11979.1	Elseya sp. Sth Alligator	Testudines	Query_233323
ANN11981.1	Emydura macquarii	Testudines	Query_233270
ANN11982.1	Emydura macquarii	Testudines	Query_233316
ANN11989.1	Emydura subglobosa	Testudines	Query_233325
ANN11997.1	Myuchelys georgesi	Testudines	Query_233336
ANN11998.1	Myuchelys georgesi	Testudines	Query_233328
ANN12000.1	Myuchelys latisternum	Testudines	Query_233293
ANN12003.1	Rheodytes leukops	Testudines	Query_233327
AOF45277.1	Clemmys guttata	Testudines	Query_233260
AOF45278.1	Clemmys guttata	Testudines	Query_233272
AOF45279.1	Chrysemys picta	Testudines	Query_233279
AOF45280.1	Chrysemys picta	Testudines	Query_233312
AOF45281.1	Deirochelys reticularia	Testudines	Query_233309
AOF45283.1	Emydoidea blandingii	Testudines	Query_233286
AOF45285.1	Emys orbicularis	Testudines	Query_233311
AOF45286.1	Emys orbicularis	Testudines	Query_233307
AOF45289.1	Graptemys barbouri	Testudines	Query_233321
AOF45295.1	Glyptemys insculpta	Testudines	Query_233297
AOF45297.1	Glyptemys muhlenbergii	Testudines	Query_233258
AOF45298.1	Malaclemys terrapin	Testudines	Query_233319
AOF45301.1	Pseudemys texana	Testudines	Query_233330
AOF45302.1	Terrapene carolina	Testudines	Query_233281
AOF45306.1	Terrapene mexicana triunguis	Testudines	Query_233263
AOF45307.1	Terrapene mexicana triunguis	Testudines	Query_233278
AOF45309.1	Terrapene ornata luteola	Testudines	Query_233285
EMP28254.1	Chelonia mydas	Testudines			Query_77286
EMP29788.1	Chelonia mydas	Testudines	Query_233282
EMP33035.1	Chelonia mydas	Testudines			Query_77293
EMP39626.1	Chelonia mydas	Testudines			Query_77276
EMP39626.2	Chelonia mydas	Testudines			Query_77277
EMP40700.1	Chelonia mydas	Testudines			Query_77288
SAP35631.1	Testudo horsfieldii	Testudines	Query_233322
SIW61225.1	Testudo horsfieldii	Testudines	Query_233353
XP_005279268.1	Chrysemys picta bellii	Testudines			Query_77274
XP_005279268.2	Chrysemys picta bellii	Testudines			Query_77275
XP_005284738.1	Chrysemys picta bellii	Testudines			Query_77282
XP_005284738.2	Chrysemys picta bellii	Testudines			Query_77283
XP_005284740.1	Chrysemys picta bellii	Testudines			Query_77284
XP_005284740.2	Chrysemys picta bellii	Testudines			Query_77285
XP_005294994.1	Chrysemys picta bellii	Testudines	Query_233299
XP_005295631.1	Chrysemys picta bellii	Testudines			Query_77287
XP_005296364.1	Chrysemys picta bellii	Testudines		Query_83933
XP_005304995.1	Chrysemys picta bellii	Testudines			Query_77269
XP_005304995.2	Chrysemys picta bellii	Testudines			Query_77270
XP_005305818.1	Chrysemys picta bellii	Testudines			Query_77290
XP_005305819.1	Chrysemys picta bellii	Testudines			Query_77291
XP_006125167.1	Pelodiscus sinensis	Testudines			Query_77292
XP_006128769.1	Pelodiscus sinensis	Testudines			Query_77278
XP_006128769.2	Pelodiscus sinensis	Testudines			Query_77279
XP_006131396.1	Pelodiscus sinensis	Testudines		Query_83934
XP_007054591.1	Chelonia mydas	Testudines			Query_77289
XP_007055843.1	Chelonia mydas	Testudines			Query_77280
XP_007055843.2	Chelonia mydas	Testudines			Query_77281
XP_007062834.1	Chelonia mydas	Testudines			Query_77294
XP_007066271.1	Chelonia mydas	Testudines	Query_233306
XP_007067832.1	Chelonia mydas	Testudines			Query_77272
XP_007067832.2	Chelonia mydas	Testudines			Query_77273
XP_007071721.1	Chelonia mydas	Testudines		Query_83935
XP_014424427.1	Pelodiscus sinensis	Testudines			Query_77295
XP_014433160.1	Pelodiscus sinensis	Testudines			Query_77271
